# Supplementary material for: The (E, Z) Isomerization of C-methoxycarbonyl-N-aryl Chlorohydrazones
Source: MDPI journal article supplement (doi:10.3390/chemistry4040106), 2022-12-02
Supplement: s1 [file s1]

# Supplementary Material

## The (*E*, *Z*) Isomerization of *C*-methoxycarbonyl-*N*-aryl chlorohydrazones

Giorgio Molteni, Fausto Cargnoni, Raffaella Soave, Alessandro Ponti

*QTAIM atomic and bond parameters.*

**Table S1.** Atomic charges ( $q$ ) and atomic dipoles ( $\mu$ ) of relevant atoms in the isomers and *umklapp* transition states of chlorohydrazone **1**. Data are derived from the topological analysis of the  $\omega$ B97M-D4/cc-pVTZ electron density within the framework of the Quantum Theory of Atoms in Molecules. When necessary, atoms are indicated by bold, underlined symbols.

### 1-Eca

| Atom                | $q$ (e) | $ \mu $ (e bohr) |
|---------------------|---------|------------------|
| C <sub>ipso</sub>   | +0.31   | 0.62             |
| <b><u>N</u></b> -H  | -0.70   | 0.40             |
| C= <b><u>N</u></b>  | -0.76   | 0.73             |
| N= <b><u>H</u></b>  | +0.41   | 0.21             |
| <b><u>C</u></b> =N  | +0.83   | 0.84             |
| Cl                  | -0.14   | 0.81             |
| <b><u>COOMe</u></b> | +1.71   | 0.78             |
| C= <b><u>O</u></b>  | -1.14   | 0.81             |
| C= <b><u>O</u></b>  | -1.18   | 0.66             |

### 1-Ecs

| Atom                | $q$ (e) | $ \mu $ (e bohr) |
|---------------------|---------|------------------|
| C <sub>ipso</sub>   | +0.31   | 0.40             |
| <b><u>N</u></b> -H  | -0.70   | 0.50             |
| C= <b><u>N</u></b>  | -0.76   | 0.73             |
| N= <b><u>H</u></b>  | +0.41   | 0.20             |
| <b><u>C</u></b> =N  | +0.83   | 0.73             |
| Cl                  | -0.26   | 0.25             |
| <b><u>COOMe</u></b> | +1.71   | 0.58             |
| C= <b><u>O</u></b>  | -1.18   | 0.60             |
| C= <b><u>O</u></b>  | -1.15   | 0.41             |

**1-Eta**

| Atom              | $q$ (e) | $ \mu $ (e bohr) |
|-------------------|---------|------------------|
| C <sub>ipso</sub> | +0.34   | 0.81             |
| <u>N</u> -H       | -0.77   | 0.55             |
| C= <u>N</u>       | -0.68   | 0.91             |
| N- <u>H</u>       | +0.49   | 0.19             |
| <u>C</u> =N       | +0.75   | 0.67             |
| Cl                | -0.19   | 0.56             |
| <u>C</u> OOMe     | +1.64   | 0.78             |
| C= <u>O</u>       | -1.20   | 0.64             |
| C- <u>O</u>       | -1.15   | 0.60             |

**1-Ets**

| Atom              | $q$ (e) | $ \mu $ (e bohr) |
|-------------------|---------|------------------|
| C <sub>ipso</sub> | +0.35   | 0.61             |
| <u>N</u> -H       | -0.76   | 0.62             |
| C= <u>N</u>       | -0.69   | 1.07             |
| N- <u>H</u>       | +0.46   | 0.19             |
| <u>C</u> =N       | +0.77   | 0.67             |
| Cl                | -0.14   | 0.66             |
| <u>C</u> OOMe     | +1.67   | 0.76             |
| C= <u>O</u>       | -1.18   | 0.81             |
| C- <u>O</u>       | -1.15   | 0.44             |

**1-Zca**

| Atom              | $q$ (e) | $ \mu $ (e bohr) |
|-------------------|---------|------------------|
| C <sub>ipso</sub> | +0.31   | 0.50             |
| <u>N</u> -H       | -0.70   | 0.73             |
| C= <u>N</u>       | -0.73   | 0.68             |
| N- <u>H</u>       | +0.41   | 0.20             |
| <u>C</u> =N       | +0.80   | 0.71             |
| Cl                | -0.27   | 0.39             |
| <u>C</u> OOMe     | +1.72   | 0.78             |
| C= <u>O</u>       | -1.18   | 0.72             |
| C- <u>O</u>       | -1.15   | 0.38             |

### 1-Zcs

| Atom              | $q$ (e) | $ \mu $ (e bohr) |
|-------------------|---------|------------------|
| C <sub>ipso</sub> | +0.31   | 0.67             |
| <u>N</u> -H       | -0.70   | 0.40             |
| C= <u>N</u>       | -0.74   | 0.66             |
| N- <u>H</u>       | +0.42   | 0.18             |
| <u>C</u> =N       | +0.81   | 0.42             |
| Cl                | -0.20   | 0.44             |
| <u>C</u> OOMe     | +1.71   | 0.74             |
| C= <u>O</u>       | -1.19   | 0.63             |
| C- <u>O</u>       | -1.14   | 0.48             |

### 1-Zta

| Atom              | $q$ (e) | $ \mu $ (e bohr) |
|-------------------|---------|------------------|
| C <sub>ipso</sub> | +0.35   | 0.76             |
| <u>N</u> -H       | -0.77   | 0.34             |
| C= <u>N</u>       | -0.68   | 0.80             |
| N- <u>H</u>       | +0.43   | 0.21             |
| <u>C</u> =N       | +0.76   | 0.57             |
| Cl                | -0.23   | 0.41             |
| <u>C</u> OOMe     | +1.72   | 0.63             |
| C= <u>O</u>       | -1.18   | 0.49             |
| C- <u>O</u>       | -1.15   | 0.29             |

### 1-Zts

| Atom              | $q$ (e) | $ \mu $ (e bohr) |
|-------------------|---------|------------------|
| C <sub>ipso</sub> | +0.35   | 0.77             |
| <u>N</u> -H       | -0.77   | 0.66             |
| C= <u>N</u>       | -0.69   | 0.71             |
| N- <u>H</u>       | +0.43   | 0.19             |
| <u>C</u> =N       | +0.77   | 0.79             |
| Cl                | -0.20   | 0.66             |
| <u>C</u> OOMe     | +1.71   | 0.82             |
| C= <u>O</u>       | -1.19   | 0.65             |
| C- <u>O</u>       | -1.14   | 0.67             |

### 1-EcaZta

| Atom              | $q$ (e) | $ \mu $ (e bohr) |
|-------------------|---------|------------------|
| C <sub>ipso</sub> | +0.29   | 0.51             |
| <u>N</u> -H       | -0.69   | 0.69             |
| C= <u>N</u>       | -0.89   | 0.90             |
| N- <u>H</u>       | +0.42   | 0.21             |
| <u>C</u> =N       | +0.95   | 0.91             |
| Cl                | -0.28   | 0.49             |
| <u>C</u> OOMe     | +1.70   | 0.65             |
| C= <u>O</u>       | -1.21   | 0.54             |
| C- <u>O</u>       | -1.15   | 0.48             |

### 1-EtaZca

| Atom              | $q$ (e) | $ \mu $ (e bohr) |
|-------------------|---------|------------------|
| C <sub>ipso</sub> | +0.30   | 0.54             |
| <u>N</u> -H       | -0.61   | 0.86             |
| C= <u>N</u>       | -0.90   | 0.86             |
| N- <u>H</u>       | +0.43   | 0.22             |
| <u>C</u> =N       | +0.96   | 0.80             |
| Cl                | -0.29   | 0.45             |
| <u>C</u> OOMe     | +1.70   | 0.71             |
| C= <u>O</u>       | -1.20   | 0.50             |
| C- <u>O</u>       | -1.15   | 0.52             |

### 1-EtsZcs

| Atom              | $q$ (e) | $ \mu $ (e bohr) |
|-------------------|---------|------------------|
| C <sub>ipso</sub> | +0.31   | 0.67             |
| <u>N</u> -H       | -0.60   | 0.66             |
| C= <u>N</u>       | -0.92   | 0.98             |
| N- <u>H</u>       | +0.42   | 0.18             |
| <u>C</u> =N       | +0.97   | 0.62             |
| Cl                | -0.21   | 0.82             |
| <u>C</u> OOMe     | +1.69   | 0.84             |
| C= <u>O</u>       | -1.18   | 0.79             |
| C- <u>O</u>       | -1.15   | 0.28             |

**1-EcsZts**

| Atom              | $q$ (e) | $ \mu $ (e bohr) |
|-------------------|---------|------------------|
| C <sub>ipso</sub> | +0.30   | 0.54             |
| <u>N</u> -H       | -0.61   | 0.67             |
| C= <u>N</u>       | -0.91   | 1.16             |
| N= <u>H</u>       | +0.41   | 0.19             |
| <u>C</u> =N       | +0.96   | 0.95             |
| Cl                | -0.28   | 0.53             |
| <u>C</u> OOMe     | +1.69   | 0.71             |
| C= <u>O</u>       | -1.19   | 0.41             |
| C= <u>O</u>       | -1.16   | 0.41             |

**Table S2.** Properties of relevant bonds in the stable isomers and *umklapp* transition states of chlorohydrazone **1**. Data are derived from the topological analysis of the  $\omega$ B97M-D4/cc-pVTZ electron density within the framework of the Quantum Theory of Atoms in Molecules. For each bond we report the two atoms involved (A-B), the internuclear separation (Distance), and the following properties computed at the bond critical point: the electron density ( $\rho$ ), the negative of the Laplacian of the electron density ( $-\nabla^2(\rho)$ ), and the ellipticity ( $\epsilon$ ).

**1-Eca**

| A-B                  | Distance (Å) | $\rho \times 10^3$ (e/Å <sup>3</sup> ) | $-\nabla^2(\rho) \times 10^3$<br>(e/Å <sup>5</sup> ) | $\epsilon$ |
|----------------------|--------------|----------------------------------------|------------------------------------------------------|------------|
| C <sub>ipso</sub> -N | 1.43         | 281                                    | 837                                                  | 0.06       |
| N-N                  | 1.36         | 356                                    | 673                                                  | 0.10       |
| C=N                  | 1.26         | 399                                    | 770                                                  | 0.48       |
| C-Cl                 | 1.74         | 202                                    | 303                                                  | 0.09       |
| C-C                  | 1.50         | 268                                    | 746                                                  | 0.14       |
| C=O                  | 1.20         | 433                                    | 238                                                  | 0.14       |
| C-O                  | 1.33         | 319                                    | 580                                                  | 0.05       |

**1-Ecs**

| A-B                  | Distance (Å) | $\rho \times 10^3$ (e/Å <sup>3</sup> ) | $-\nabla^2(\rho) \times 10^3$<br>(e/Å <sup>5</sup> ) | $\epsilon$ |
|----------------------|--------------|----------------------------------------|------------------------------------------------------|------------|
| C <sub>ipso</sub> -N | 1.43         | 282                                    | 842                                                  | 0.06       |
| N-N                  | 1.36         | 356                                    | 673                                                  | 0.10       |
| C=N                  | 1.26         | 398                                    | 764                                                  | 0.47       |
| C-Cl                 | 1.74         | 204                                    | 309                                                  | 0.09       |
| C-C                  | 1.51         | 267                                    | 737                                                  | 0.08       |
| C=O                  | 1.20         | 434                                    | 230                                                  | 0.14       |
| C-O                  | 1.33         | 318                                    | 580                                                  | 0.05       |

**1-Eta**

| A-B                  | Distance (Å) | $\rho \times 10^3$ (e/Å <sup>3</sup> ) | $-\nabla^2(\rho) \times 10^3$<br>(e/Å <sup>5</sup> ) | $\epsilon$ |
|----------------------|--------------|----------------------------------------|------------------------------------------------------|------------|
| C <sub>ipso</sub> -N | 1.40         | 296                                    | 1202                                                 | 0.01       |
| N-N                  | 1.31         | 401                                    | 934                                                  | 0.13       |
| C=N                  | 1.28         | 381                                    | 707                                                  | 0.51       |
| C-Cl                 | 1.74         | 203                                    | 308                                                  | 0.10       |
| C-C                  | 1.48         | 279                                    | 806                                                  | 0.18       |
| C=O                  | 1.21         | 418                                    | 372                                                  | 0.12       |
| C-O                  | 1.33         | 323                                    | 588                                                  | 0.05       |
| O...H                | 1.90         | 31                                     | -120                                                 | 0.11       |

**1-Ets**

| A-B                  | Distance (Å) | $\rho \times 10^3$ (e/Å <sup>3</sup> ) | $-\nabla^2(\rho) \times 10^3$<br>(e/Å <sup>5</sup> ) | $\epsilon$ |
|----------------------|--------------|----------------------------------------|------------------------------------------------------|------------|
| C <sub>ipso</sub> -N | 1.40         | 298                                    | 856                                                  | 0.08       |
| N-N                  | 1.32         | 395                                    | 900                                                  | 0.12       |
| C=N                  | 1.27         | 383                                    | 669                                                  | 0.50       |
| C-Cl                 | 1.74         | 205                                    | 313                                                  | 0.10       |
| C-C                  | 1.49         | 270                                    | 752                                                  | 0.16       |
| C=O                  | 1.20         | 437                                    | 238                                                  | 0.13       |
| C-O                  | 1.35         | 303                                    | 581                                                  | 0.03       |
| O...H                | 1.94         | 27                                     | -115                                                 | 0.04       |

**1-Zca**

| A-B                  | Distance (Å) | $\rho \times 10^3$ (e/Å <sup>3</sup> ) | $-\nabla^2(\rho) \times 10^3$<br>(e/Å <sup>5</sup> ) | $\epsilon$ |
|----------------------|--------------|----------------------------------------|------------------------------------------------------|------------|
| C <sub>ipso</sub> -N | 1.43         | 279                                    | 822                                                  | 0.06       |
| N-N                  | 1.35         | 366                                    | 736                                                  | 0.10       |
| C=N                  | 1.26         | 394                                    | 762                                                  | 0.45       |
| C-Cl                 | 1.74         | 200                                    | 281                                                  | 0.07       |
| C-C                  | 1.50         | 266                                    | 734                                                  | 0.15       |
| C=O                  | 1.19         | 434                                    | 248                                                  | 0.13       |
| C-O                  | 1.33         | 316                                    | 585                                                  | 0.05       |

**1-Zcs**

| A-B                  | Distance (Å) | $\rho \times 10^3$ (e/Å <sup>3</sup> ) | $-\nabla^2(\rho) \times 10^3$<br>(e/Å <sup>5</sup> ) | $\epsilon$ |
|----------------------|--------------|----------------------------------------|------------------------------------------------------|------------|
| C <sub>ipso</sub> -N | 1.43         | 278                                    | 820                                                  | 0.06       |
| N-N                  | 1.35         | 363                                    | 714                                                  | 0.10       |
| C=N                  | 1.26         | 394                                    | 772                                                  | 0.43       |
| C-Cl                 | 1.73         | 204                                    | 297                                                  | 0.08       |
| C-C                  | 1.50         | 268                                    | 746                                                  | 0.15       |
| C=O                  | 1.20         | 433                                    | 264                                                  | 0.13       |
| C-O                  | 1.33         | 318                                    | 600                                                  | 0.05       |

**1-Zta**

| A-B                  | Distance (Å) | $\rho \times 10^3$ (e/Å <sup>3</sup> ) | $-\nabla^2(\rho) \times 10^3$<br>(e/Å <sup>5</sup> ) | $\epsilon$ |
|----------------------|--------------|----------------------------------------|------------------------------------------------------|------------|
| C <sub>ipso</sub> -N | 1.40         | 294                                    | 824                                                  | 0.06       |
| N-N                  | 1.31         | 401                                    | 941                                                  | 0.12       |
| C=N                  | 1.27         | 387                                    | 678                                                  | 0.52       |
| C-Cl                 | 1.75         | 195                                    | 269                                                  | 0.08       |
| C-C                  | 1.49         | 273                                    | 773                                                  | 0.17       |
| C=O                  | 1.20         | 433                                    | 272                                                  | 0.13       |
| C-O                  | 1.34         | 316                                    | 593                                                  | 0.05       |

## 1-Zts

| A-B                  | Distance (Å) | $\rho \times 10^3$ (e/Å <sup>3</sup> ) | $-\nabla^2(\rho) \times 10^3$<br>(e/Å <sup>5</sup> ) | $\epsilon$ |
|----------------------|--------------|----------------------------------------|------------------------------------------------------|------------|
| C <sub>ipso</sub> -N | 1.40         | 296                                    | 1205                                                 | 0.04       |
| N-N                  | 1.32         | 398                                    | 923                                                  | 0.12       |
| C=N                  | 1.27         | 387                                    | 680                                                  | 0.51       |
| C-Cl                 | 1.75         | 199                                    | 284                                                  | 0.08       |
| C-C                  | 1.49         | 274                                    | 786                                                  | 0.17       |
| C=O                  | 1.20         | 432                                    | 285                                                  | 0.13       |
| C-O                  | 1.33         | 317                                    | 607                                                  | 0.05       |

## 1-EcaZta

| A-B                  | Distance (Å) | $\rho \times 10^3$ (e/Å <sup>3</sup> ) | $-\nabla^2(\rho) \times 10^3$<br>(e/Å <sup>5</sup> ) | $\epsilon$ |
|----------------------|--------------|----------------------------------------|------------------------------------------------------|------------|
| C <sub>ipso</sub> -N | 1.42         | 284                                    | 814                                                  | 0.08       |
| N-N                  | 1.28         | 417                                    | 1036                                                 | 0.11       |
| C=N                  | 1.23         | 381                                    | -54                                                  | 0.48       |
| C-Cl                 | 1.81         | 175                                    | 181                                                  | 0.11       |
| C-C                  | 1.51         | 264                                    | 712                                                  | 0.16       |
| C=O                  | 1.21         | 427                                    | 292                                                  | 0.11       |
| C-O                  | 1.33         | 321                                    | 577                                                  | 0.05       |
| O...H <sup>a</sup>   | 2.05         | 21                                     | -81                                                  | 0.01       |

(a) The hydrogen atom involved in this bond is one of the phenyl *ortho* hydrogen atoms.



### 1-EtsZcs

| A-B                  | Distance (Å) | $\rho \times 10^3$ (e/Å <sup>3</sup> ) | $-\nabla^2(\rho) \times 10^3$<br>(e/Å <sup>5</sup> ) | $\epsilon$ |
|----------------------|--------------|----------------------------------------|------------------------------------------------------|------------|
| C <sub>ipso</sub> -N | 1.41         | 289                                    | 837                                                  | 0.08       |
| N-N                  | 1.28         | 422                                    | 1066                                                 | 0.10       |
| C=N                  | 1.22         | 382                                    | -134                                                 | 0.45       |
| C-Cl                 | 1.80         | 178                                    | 192                                                  | 0.10       |
| C-C                  | 1.51         | 266                                    | 723                                                  | 0.16       |
| C=O                  | 1.20         | 435                                    | 232                                                  | 0.12       |
| C-O                  | 1.34         | 310                                    | 591                                                  | 0.03       |
| Cl...H <sup>a</sup>  | 2.83         | 7                                      | -24                                                  | 0.26       |

(a) The hydrogen atom involved in this bond is one of the phenyl *ortho* hydrogen atoms.

### 1-EcsZts

| A-B                  | Distance (Å) | $\rho \times 10^3$ (e/Å <sup>3</sup> ) | $-\nabla^2(\rho) \times 10^3$<br>(e/Å <sup>5</sup> ) | $\epsilon$ |
|----------------------|--------------|----------------------------------------|------------------------------------------------------|------------|
| C <sub>ipso</sub> -N | 1.42         | 287                                    | 836                                                  | 0.08       |
| N-N                  | 1.28         | 416                                    | 1030                                                 | 0.10       |
| C=N                  | 1.22         | 382                                    | -91                                                  | 0.46       |
| C-Cl                 | 1.80         | 178                                    | 192                                                  | 0.10       |
| C-C                  | 1.51         | 265                                    | 714                                                  | 0.15       |
| C=O                  | 1.20         | 435                                    | 230                                                  | 0.12       |
| C-O                  | 1.34         | 311                                    | 580                                                  | 0.03       |
| O...H <sup>a</sup>   | 2.33         | 13                                     | -51                                                  | 0.20       |

(a) The hydrogen atom involved in this bond is one of the phenyl *ortho* hydrogen atoms.

### 1-EtaZca

| A-B                  | Distance (Å) | $\rho \times 10^3$ (e/Å <sup>3</sup> ) | $-\nabla^2(\rho) \times 10^3$<br>(e/Å <sup>5</sup> ) | $\epsilon$ |
|----------------------|--------------|----------------------------------------|------------------------------------------------------|------------|
| C <sub>ipso</sub> -N | 1.39         | 289                                    | 839                                                  | 0.08       |
| N-N                  | 1.28         | 423                                    | 1072                                                 | 0.10       |
| C=N                  | 1.22         | 382                                    | -143                                                 | 0.46       |
| C-Cl                 | 1.81         | 174                                    | 178                                                  | 0.10       |
| C-C                  | 1.51         | 264                                    | 708                                                  | 0.16       |
| C=O                  | 1.20         | 429                                    | 272                                                  | 0.12       |
| C-O                  | 1.33         | 320                                    | 569                                                  | 0.04       |
| Cl...H <sup>a</sup>  | 2.80         | 8                                      | -26                                                  | 0.19       |

(a) The hydrogen atom involved in this bond is one of the phenyl *ortho* hydrogen atoms.

**Table S3.** Delocalization indexes of selected atom pairs of the four lowest-energy isomers of chlorohydrazone **1**. Data are derived from the topological analysis of the  $\omega$ B97M-D4/cc-pVTZ electron density. Each atomic pair comprises the two atoms underlined in the first and second column. The first eight lines correspond to covalent bonds, the other ones to non-covalent interactions.

|                          |              | <b>1</b> -Eta | <b>1</b> -Ets | <b>1</b> -Zta | <b>1</b> -Zts |
|--------------------------|--------------|---------------|---------------|---------------|---------------|
| <u>C</u> <sub>ipso</sub> | <u>N</u> -H  | 0.954         | 0.953         | 0.943         | 0.947         |
| <u>N</u> -H              | N- <u>H</u>  | 0.656         | 0.687         | 0.725         | 0.723         |
| <u>N</u> -H              | C= <u>N</u>  | 1.408         | 1.389         | 1.386         | 1.379         |
| <u>C</u> =N              | C= <u>N</u>  | 1.449         | 1.470         | 1.476         | 1.478         |
| <u>C</u> -Cl             | C- <u>Cl</u> | 1.061         | 1.060         | 1.030         | 1.039         |
| <u>C</u> -Cl             | <u>C</u> =O  | 0.925         | 0.903         | 0.888         | 0.890         |
| <u>C</u> =O              | C= <u>O</u>  | 1.187         | 1.253         | 1.239         | 1.236         |
| <u>C</u> -O              | C- <u>O</u>  | 0.845         | 0.810         | 0.827         | 0.836         |
| N- <u>H</u>              | <u>Cl</u>    | 0.001         | 0.002         | 0.051         | 0.051         |
| <u>N</u> -H              | <u>Cl</u>    | 0.041         | 0.041         | 0.084         | 0.083         |
| C= <u>N</u>              | <u>Cl</u>    | 0.196         | 0.203         | 0.198         | 0.197         |
| N- <u>H</u>              | C- <u>O</u>  | 0.002         | 0.062         | 0.000         | 0.001         |
| <u>N</u> -H              | C- <u>O</u>  | 0.010         | 0.067         | 0.008         | 0.008         |
| C= <u>N</u>              | C- <u>O</u>  | 0.021         | 0.031         | 0.019         | 0.067         |
| N- <u>H</u>              | C= <u>O</u>  | 0.075         | 0.002         | 0.001         | 0.001         |
| <u>N</u> -H              | C= <u>O</u>  | 0.090         | 0.017         | 0.016         | 0.017         |
| C= <u>N</u>              | C= <u>O</u>  | 0.054         | 0.044         | 0.079         | 0.040         |

### *Robustness of the computational method*

The Tables and Figures in the Supplementary Material allow one to compare the DFT computational results at the M08HX/cc-pVDZ, M08HX/cc-pVTZ, and  $\omega$ B97M-D4/cc-pVTZ level of theory in order to assess the robustness of our computational approach. Comparison of the quantitative and graphical data shows that there are no qualitative and small quantitative differences between the above levels of theory and we can conclude that our computational approach is robust, meaning that use of other levels of theory of quality comparable to the ones we used, should not change the presented description of (*E*, *Z*) Isomerization of *C*-methoxycarbonyl-*N*-aryl chlorohydrazones. We are therefore confident that the conclusions we have drawn from the computational investigation of chlorohydrazones **1-7** are well founded.

As an example, we compare in some detail the results for compound **1**. The qualitative picture of the isomer energetic location (Figure S1) is the same for the employed theory levels (M08HX/cc-pVDZ and /cc-pVTZ,  $\omega$ B97M-D4/cc-pVTZ). The energetics of the minimum energy structures of **1** is collected in Table S4. The differences between M08HX/cc-pVDZ and M08HX/cc-pVTZ free energy are small, with mean unsigned difference MSD = 0.7 kJ/mol and mean absolute difference MAD = 1.3 kJ/mol. The population increase of the most stable isomer Zts from 64 to 73% is accompanied by the decrease of Zta (25 to 22%) and Eta, which is about halved from 11% to 5%. Use of the  $\omega$ B97M-D4 functional brings about somewhat larger energetic differences (MSD = -2.4 and MAD = 3.5 kJ/mol), which are mainly due to the D4 dispersion term. Judging from the electronic energy, where the dispersion contribution can be distinguished, the crowded **1**-Ecy isomers are dispersion-stabilized by more than 10 kJ/mol, whereas the dispersion contribution to  $\Delta G$  is of at most 3 kJ/mol for the planar **1**- $\Phi$ ty isomers.

The molecular structure of the isomers of **1** can be found in Figure S2 (M08HX/cc-pVTZ only) and selected geometric parameters of **1** calculated at the three theory levels are collected in Table S5. On passing from the cc-pVDZ to the cc-pVTZ basis set with the M08HX functional, the C=N, N-N, and N-C<sub>ipso</sub> bond lengths decrease by less than 0.01 Å, the  $\Phi$ ,  $\theta$ , and  $\psi$  angles change by less than  $\approx 1^\circ$ , with the exception of  $\psi$  of unimportant Eca that increases by 2.9°. The  $\omega$ B97M-D4 functional causes N-N and N-C<sub>ipso</sub> bond lengths to increase by less than 0.02 Å (C=N is practically unchanged),  $\approx 1^\circ$  differences in  $\Phi$  are  $\approx 1^\circ$  but somewhat larger in  $\theta$  ( $< 4^\circ$ ) and  $\psi$  ( $< 8^\circ$ ). Note that, in the case of **1**,  $\psi$  is just the torsional angle of the phenyl ring with respect to the C=N-N moiety, it is not related to isomerism.

The  $\pi$  MOs of **1**-Zts calculated at the M08HX/cc-pVDZ and M08HX/cc-pVTZ level can be found in Figures 4 and 5, and compared with the corresponding  $\omega$ B97M-D4/cc-pVTZ MOs in the main text.

The energetics of the minimum energy structures of **2-7** are collected in Tables 8-13. The considerations carried out above for **1** also apply to **2-7**. The isomerization barriers of **1** are collected in Table S14 and plotted in Figure S7. The molecular geometry and geometric parameters of selected TSs of **1** can be found in Table S15 and Figure S8. The barriers present in the shortest paths for the interconversion between **1**-Zta and **1**-Eta are plotted in Figure S9.

The  $\pi$  MOs of **1**-EtsZcs calculated at the M08HX/cc-pVDZ and M08HX/cc-pVTZ level can be found in Figures 11 and 12, and compared with the corresponding  $\omega$ B97M-D4/cc-pVTZ MOs in the main text.

Selected isomerization barriers of **2-7** are collected in Tables 16-21.

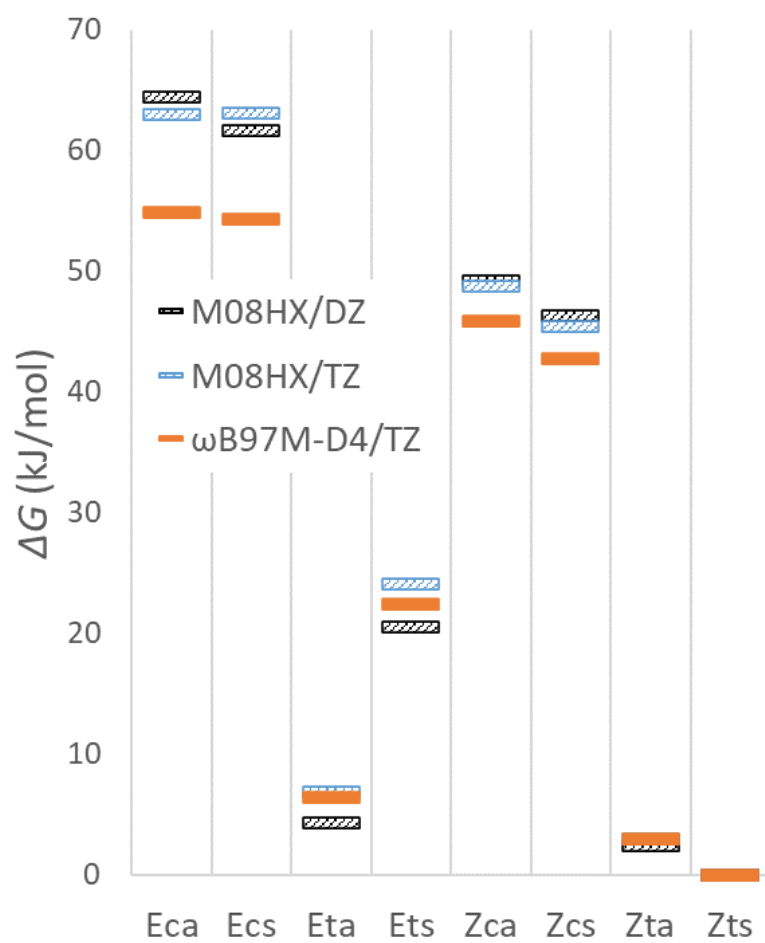

**Figure S1.** Relative free energy at 298 K of the minimum energy structures of **1** calculated at different levels of theory. The vertical lines are just a guide to the eye.

**Table S4.** Energetics of the minimum energy structures of **1**. Absolute electronic energy  $E$  and Gibbs free energy  $G$  (atomic units) are listed along with the reaction free energy  $\Delta G$  (kJ/mol) and the relative population at 298 K.

|     | M08HX/cc-pVDZ |            |                     |           | M08HX/cc-pVTZ |            |                     |           | $\omega$ B97M-D4/cc-pVTZ |            |                     |           |
|-----|---------------|------------|---------------------|-----------|---------------|------------|---------------------|-----------|--------------------------|------------|---------------------|-----------|
|     | $E$ (a.u.)    | $G$ (a.u.) | $\Delta G$ (kJ/mol) | Rel. pop. | $E$ (a.u.)    | $G$ (a.u.) | $\Delta G$ (kJ/mol) | Rel. pop. | $E$ (a.u.)               | $G$ (a.u.) | $\Delta G$ (kJ/mol) | Rel. pop. |
| Eca | -1068.320     | -1068.188  | 64.5                | 3.3E-12   | -1068.519     | -1068.387  | 63.0                | 6.8E-12   | -1068.940                | -1068.806  | 54.9                | 1.7E-10   |
| Ecs | -1068.322     | -1068.189  | 61.7                | 1.0E-11   | -1068.520     | -1068.387  | 63.1                | 6.5E-12   | -1068.940                | -1068.806  | 54.3                | 2.2E-10   |
| Eta | -1068.344     | -1068.211  | 4.4                 | 0.11      | -1068.541     | -1068.408  | 6.9                 | 0.05      | -1068.959                | -1068.824  | 6.4                 | 0.06      |
| Ets | -1068.337     | -1068.205  | 20.5                | 1.6E-04   | -1068.534     | -1068.402  | 24.1                | 4.4E-05   | -1068.952                | -1068.818  | 22.4                | 8.6E-05   |
| Zca | -1068.326     | -1068.194  | 49.1                | 1.6E-09   | -1068.525     | -1068.392  | 48.8                | 2.1E-09   | -1068.943                | -1068.809  | 45.9                | 6.7E-09   |
| Zcs | -1068.327     | -1068.195  | 46.3                | 5.1E-09   | -1068.526     | -1068.394  | 45.4                | 8.0E-09   | -1068.944                | -1068.810  | 42.8                | 2.3E-08   |
| Zta | -1068.344     | -1068.212  | 2.4                 | 0.25      | -1068.542     | -1068.410  | 3.0                 | 0.22      | -1068.959                | -1068.826  | 3.0                 | 0.22      |
| Zts | -1068.345     | -1068.213  | 0.0                 | 0.64      | -1068.543     | -1068.411  | 0.0                 | 0.73      | -1068.960                | -1068.827  | 0.0                 | 0.73      |

**Table S5.** Selected molecular geometric parameters of the minimum energy structures of **1**. Bond lengths in angstrom, planar and dihedral angles in degree.

|     | M08HX/cc-pVDZ |       |        |          |        |                | M08HX/cc-pVTZ |       |        |          |        |                | $\omega$ B97M-D4/cc-pVTZ |       |        |          |        |                |
|-----|---------------|-------|--------|----------|--------|----------------|---------------|-------|--------|----------|--------|----------------|--------------------------|-------|--------|----------|--------|----------------|
|     | C=N           | N-N   | $\Phi$ | $\theta$ | $\psi$ | $\delta\Sigma$ | C=N           | N-N   | $\Phi$ | $\theta$ | $\psi$ | $\delta\Sigma$ | C=N                      | N-N   | $\Phi$ | $\theta$ | $\psi$ | $\delta\Sigma$ |
| Eca | 1.269         | 1.354 | 239.3  | -39.9    | -28.9  | 14.9           | 1.261         | 1.349 | 238.0  | -39.3    | -26.0  | 12.2           | 1.259                    | 1.362 | 238.2  | -38.9    | -33.7  | 15.3           |
| Ecs | 1.271         | 1.351 | 237.7  | -39.5    | -25.3  | 13.3           | 1.262         | 1.349 | 236.9  | -38.6    | -25.3  | 11.8           | 1.260                    | 1.362 | 237.3  | -40.1    | -29.0  | 14.8           |
| Eta | 1.286         | 1.309 | 237.6  | 179.8    | 0.1    | 0.0            | 1.278         | 1.306 | 236.9  | 179.8    | 0.4    | 0.0            | 1.277                    | 1.314 | 237.4  | 178.9    | 0.9    | 0.0            |
| Ets | 1.281         | 1.311 | 235.4  | 179.8    | 0.1    | 0.0            | 1.273         | 1.309 | 234.5  | 179.8    | 0.4    | 0.0            | 1.271                    | 1.317 | 235.1  | 178.8    | 1.3    | 0.0            |
| Zca | 1.273         | 1.339 | 123.7  | -46.8    | -21.9  | 13.2           | 1.264         | 1.337 | 124.1  | -47.0    | -20.6  | 12.4           | 1.262                    | 1.351 | 123.7  | -49.7    | -23.8  | 16.1           |
| Zcs | 1.273         | 1.341 | 123.5  | -47.2    | -21.3  | 13.4           | 1.265         | 1.339 | 123.8  | -47.6    | -19.9  | 12.8           | 1.263                    | 1.356 | 123.0  | -51.0    | -23.8  | 17.0           |
| Zta | 1.277         | 1.308 | 121.6  | 179.7    | -0.7   | 0.0            | 1.269         | 1.307 | 121.6  | 180.0    | -0.4   | 0.0            | 1.268                    | 1.314 | 121.4  | 181.2    | 0.0    | 0.0            |
| Zts | 1.276         | 1.310 | 121.2  | 180.0    | -0.2   | 0.0            | 1.269         | 1.309 | 121.2  | 180.0    | -0.2   | 0.0            | 1.268                    | 1.317 | 121.1  | 180.6    | 1.3    | 15.3           |

$\delta\Sigma$  is the the difference  $\delta\Sigma = 360^\circ - \Sigma$ , where  $\Sigma$  is the sum of the planar angles about the -NH- nitrogen atom.

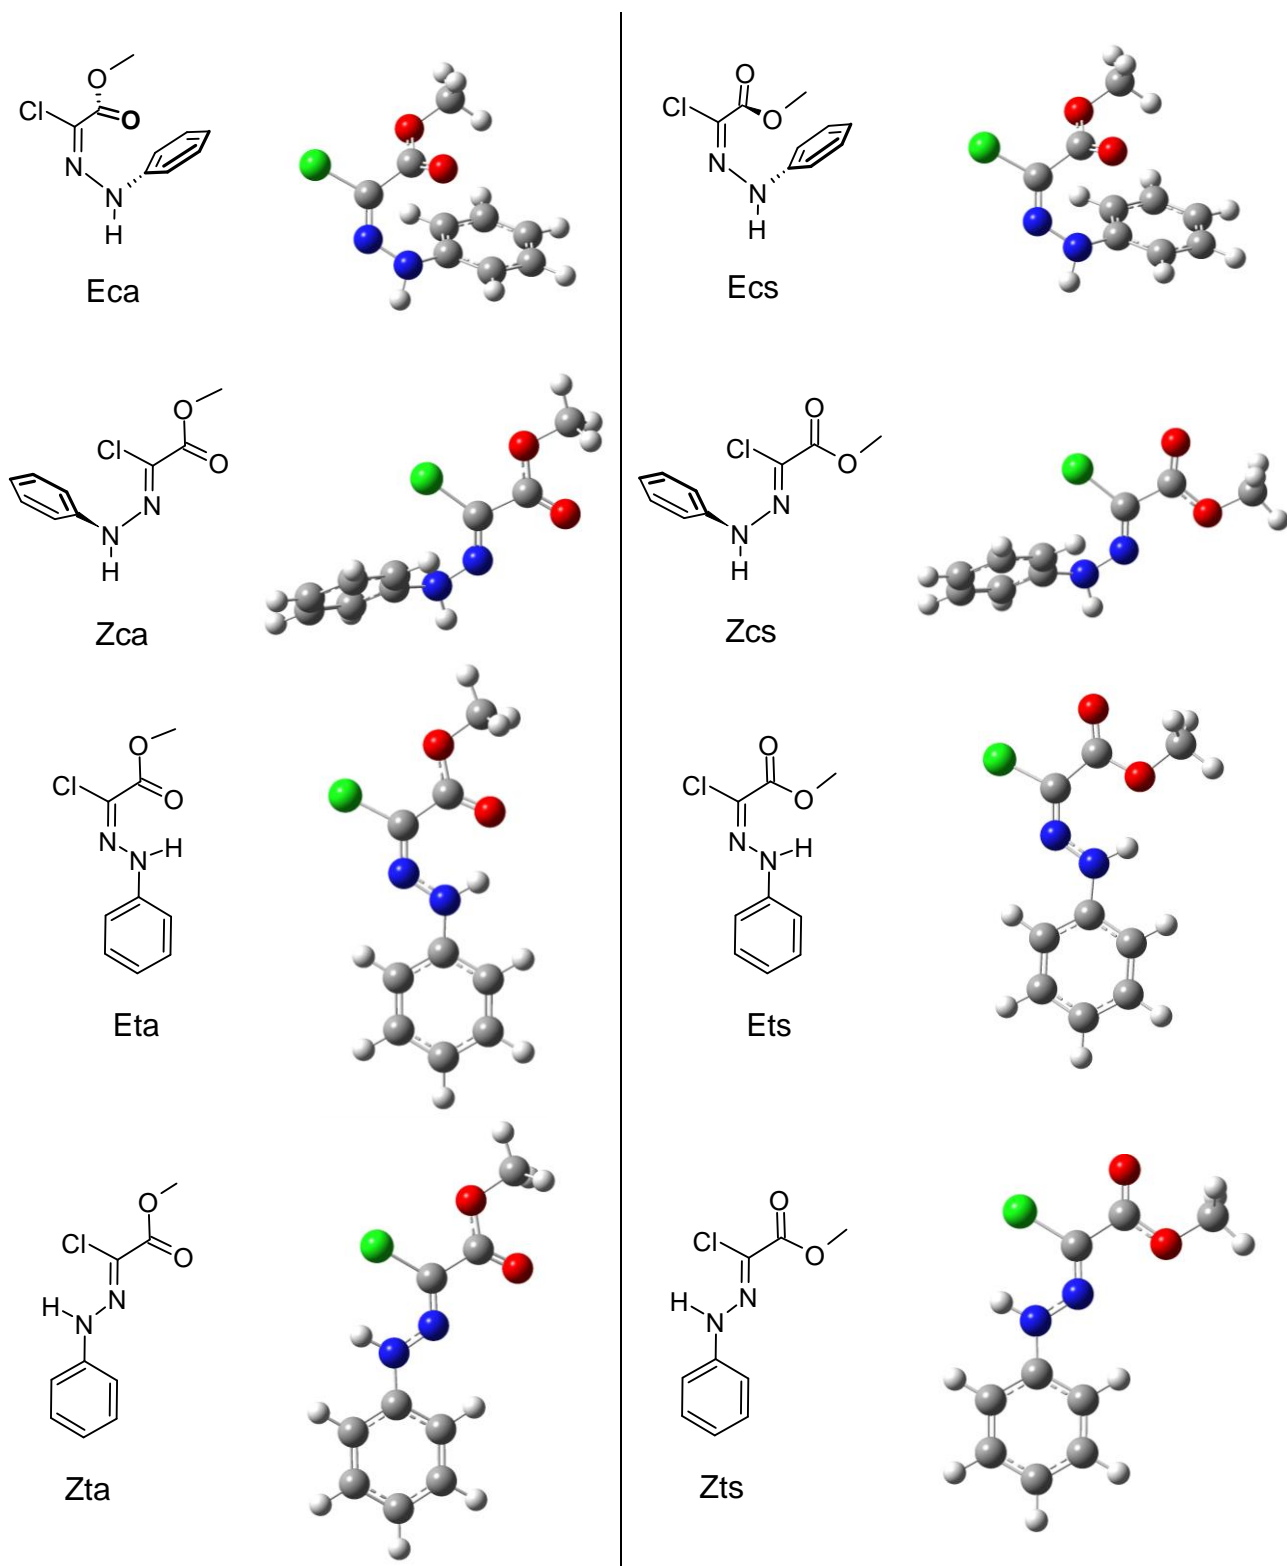

**Figure S2.** Minimum energy structures of **1** calculated at the M08HX/cc-pVTZ level.

**Table S6.** Length of the N-N and N-C<sub>ipso</sub> bonds (Å) in selected small molecules.

|                                  | M08HX<br>/cc-pVDZ | M08HX<br>/cc-pVTZ | $\omega$ B97M-D4<br>/cc-pVTZ |
|----------------------------------|-------------------|-------------------|------------------------------|
|                                  | N-N               | N-N               | N-N                          |
| H <sub>2</sub> N–NH <sub>2</sub> | 1.465             | 1.466             | 1.476                        |
| H <sub>2</sub> N–NHPH            | 1.399             | 1.399             | 1.407                        |
| HN=NH (Z)                        | 1.231             | 1.226             | 1.233                        |
| HN=NH (E)                        | 1.234             | 1.227             | 1.235                        |
| HN=NPh (Z) <sup>a</sup>          | 1.238             | 1.230             | 1.236                        |
| HN=NPh (E) <sup>b</sup>          | 1.234             | 1.227             | 1.232                        |
| N≡N                              | 1.096             | 1.084             | 1.091                        |

<sup>a</sup> Planar structure. <sup>b</sup> Non-planar structure.**Table S7.** Length of the N–H ... O hydrogen bond (Å) in **1**-Et(a,s) isomers.

|               | M08HX<br>/cc-pVDZ | M08HX<br>/cc-pVTZ | $\omega$ B97M-D4<br>/cc-pVTZ |
|---------------|-------------------|-------------------|------------------------------|
| <b>1</b> -Eta | 1.907             | 1.906             | 1.904                        |
| <b>1</b> -Ets | 1.944             | 1.958             | 1.951                        |

The presence of  $\pi$  occupied MOs extending over the N–N and N–C<sub>ipso</sub> bonds, shown in the Figure below, is consistent with the extended delocalization picture and partial double bond character of the N–N bond. However, it should be borne in mind that such MOs do not represent proof additional to the structural data as the molecular geometry is dictated by the minimization of electronic energy.

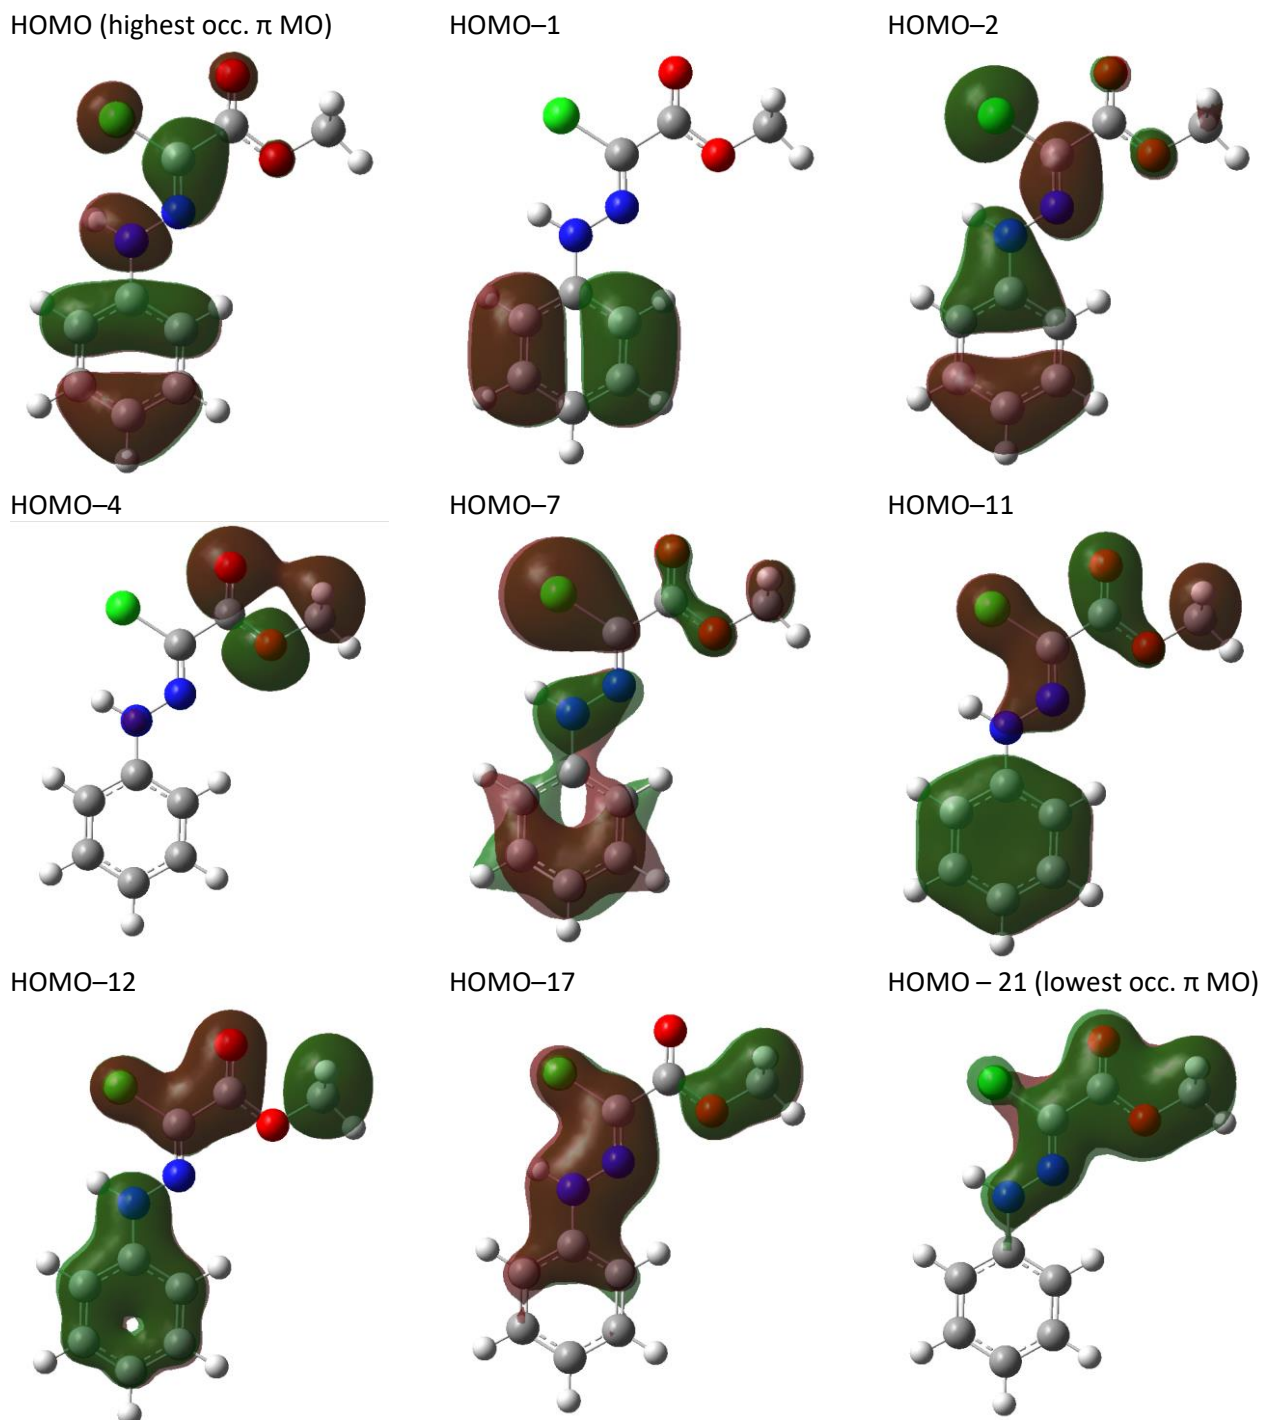

**Figure S3.**  $\omega$ B97M-D4/cc-pVTZ  $\pi$  MOs of **1-Zts**.

The presence of  $\pi$  occupied MOs extending over the N–N and N–C<sub>ipso</sub> bonds is consistent with the extended delocalization picture and partial double bond character of the N–N bond. However, it should be borne in



mind that such MOs do not represent proof additional to the structural data as the molecular geometry is dictated by the minimization of electronic energy.

55 = HOMO

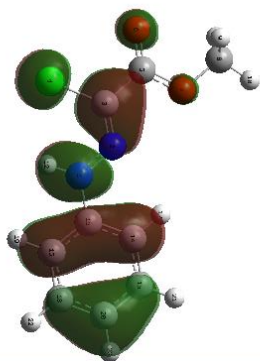

54

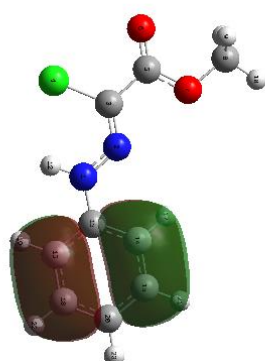

53

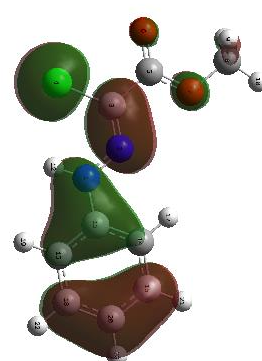

51

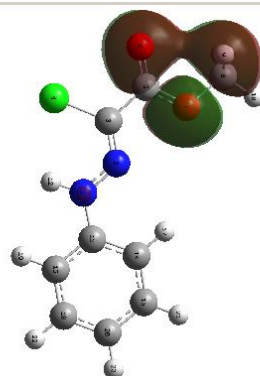

47

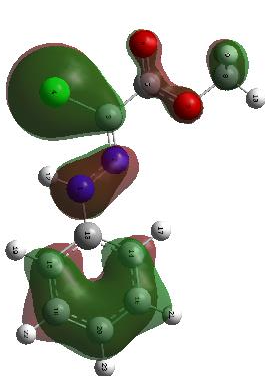

44

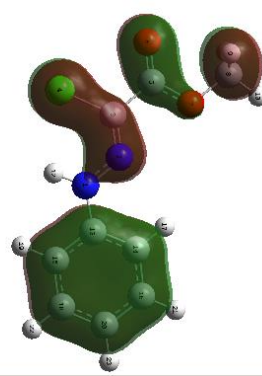

43

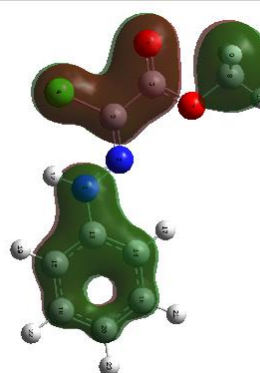

**Figure S4.** Selected M08HX/cc-pVDZ  $\pi$  MOs of **1-Zts**.

55 HOMO highest occ.  $\pi$  MO

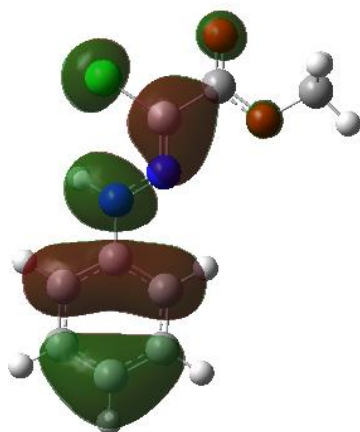

47 HOMO – 8

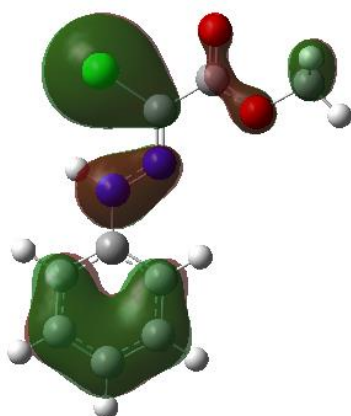

44

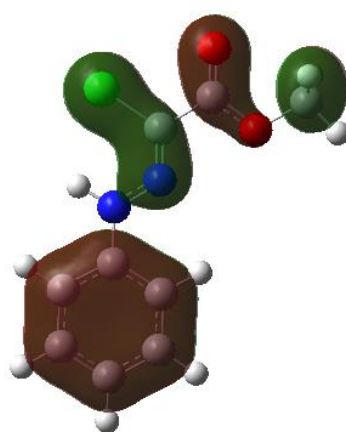

43

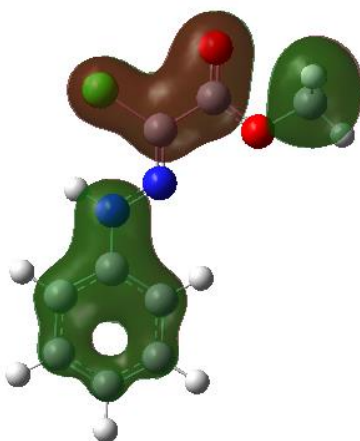

38

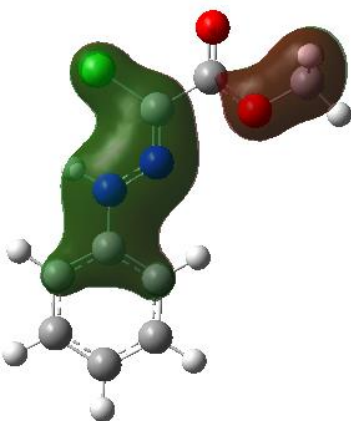

35 HOMO – 20 lowest occ.  $\pi$  MO

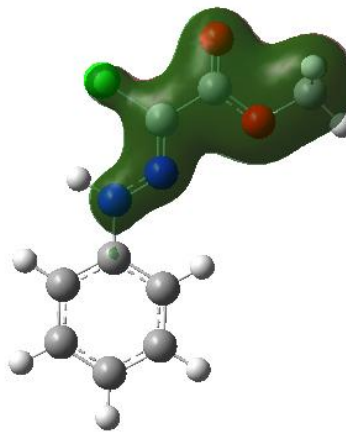

**Figure S5.** Selected M08HX/cc-pVTZ  $\pi$  MOs of **1-Zts**.

**Table S8.** Energetics of the minimum energy structures of **2**. Absolute electronic energy  $E$  and Gibbs free energy  $G$  (atomic units) are listed along with the reaction free energy  $\Delta G$  (kJ/mol) and the relative population at 298 K.

|     | M08HX/cc-pVDZ |            |                     |           | M08HX/cc-pVTZ |            |                     |           | $\omega$ B97M-D4/cc-pVTZ |            |                     |           |
|-----|---------------|------------|---------------------|-----------|---------------|------------|---------------------|-----------|--------------------------|------------|---------------------|-----------|
|     | $E$ (a.u.)    | $G$ (a.u.) | $\Delta G$ (kJ/mol) | Rel. pop. | $E$ (a.u.)    | $G$ (a.u.) | $\Delta G$ (kJ/mol) | Rel. pop. | $E$ (a.u.)               | $G$ (a.u.) | $\Delta G$ (kJ/mol) | Rel. pop. |
| Eca | -1527.898     | -1527.778  | 62.4                | 8.1E-12   | -1528.120     | -1528.000  | 63.3                | 5.5E-12   | -1528.613                | -1528.490  | 53.8                | 2.6E-10   |
| Ecs | -1527.899     | -1527.778  | 61.9                | 9.8E-12   | -1528.121     | -1527.999  | 63.8                | 4.5E-12   | -1528.613                | -1528.490  | 54.8                | 1.7E-10   |
| Eta | -1527.921     | -1527.800  | 3.4                 | 0.17      | -1528.142     | -1528.021  | 6.7                 | 0.05      | -1528.631                | -1528.508  | 5.5                 | 0.07      |
| Ets | -1527.915     | -1527.794  | 19.3                | 2.8E-04   | -1528.135     | -1528.015  | 24.1                | 4.1E-05   | -1528.625                | -1528.502  | 21.9                | 1.0E-04   |
| Zca | -1527.903     | -1527.783  | 48.3                | 2.4E-09   | -1528.125     | -1528.005  | 48.3                | 2.4E-09   | -1528.616                | -1528.493  | 46.0                | 5.9E-09   |
| Zcs | -1527.904     | -1527.784  | 45.5                | 7.3E-09   | -1528.127     | -1528.006  | 45.5                | 7.2E-09   | -1528.617                | -1528.494  | 42.6                | 2.4E-08   |
| Zta | -1527.921     | -1527.801  | 2.8                 | 0.22      | -1528.143     | -1528.022  | 3.5                 | 0.17      | -1528.632                | -1528.510  | 2.6                 | 0.24      |
| Zts | -1527.922     | -1527.802  | 0.0                 | 0.68      | -1528.144     | -1528.024  | 0.0                 | 0.68      | -1528.633                | -1528.511  | 0.0                 | 0.68      |

**Table S9.** Energetics of the minimum energy structures of **3**. Absolute electronic energy  $E$  and Gibbs free energy  $G$  (atomic units) are listed along with the reaction free energy  $\Delta G$  (kJ/mol) and the relative population at 298 K.

|     | M08HX/cc-pVDZ |            |                     |           | M08HX/cc-pVTZ |            |                     |           | $\omega$ B97M-D4/cc-pVTZ |            |                     |           |
|-----|---------------|------------|---------------------|-----------|---------------|------------|---------------------|-----------|--------------------------|------------|---------------------|-----------|
|     | $E$ (a.u.)    | $G$ (a.u.) | $\Delta G$ (kJ/mol) | Rel. pop. | $E$ (a.u.)    | $G$ (a.u.) | $\Delta G$ (kJ/mol) | Rel. pop. | $E$ (a.u.)               | $G$ (a.u.) | $\Delta G$ (kJ/mol) | Rel. pop. |
| Eca | -1484.401     | -1484.282  | 63.5                | 5.2E-12   | -1484.623     | -1484.504  | 63.7                | 4.7E-12   | -1485.092                | -1484.971  | 54.3                | 2.1E-10   |
| Ecs | -1484.402     | -1484.283  | 61.9                | 9.8E-12   | -1484.624     | -1484.504  | 63.9                | 4.5E-12   | -1485.092                | -1484.970  | 54.9                | 1.6E-10   |
| Eta | -1484.424     | -1484.305  | 4.7                 | 0.11      | -1484.645     | -1484.525  | 7.5                 | 0.03      | -1485.111                | -1484.989  | 5.7                 | 0.07      |
| Ets | -1484.418     | -1484.299  | 19.7                | 2.4E-04   | -1484.638     | -1484.519  | 24.1                | 4.1E-05   | -1485.104                | -1484.983  | 21.9                | 9.8E-05   |
| Zca | -1484.406     | -1484.288  | 48.3                | 2.4E-09   | -1484.628     | -1484.510  | 48.5                | 2.2E-09   | -1485.095                | -1484.974  | 46.4                | 5.1E-09   |
| Zcs | -1484.407     | -1484.289  | 45.7                | 6.7E-09   | -1484.630     | -1484.511  | 45.6                | 7.1E-09   | -1485.096                | -1484.975  | 42.7                | 2.3E-08   |
| Zta | -1484.424     | -1484.306  | 2.0                 | 0.31      | -1484.646     | -1484.527  | 2.9                 | 0.21      | -1485.111                | -1484.990  | 2.6                 | 0.24      |
| Zts | -1484.425     | -1484.307  | 0.0                 | 0.69      | -1484.647     | -1484.528  | 0.0                 | 0.69      | -1485.112                | -1484.991  | 0.0                 | 0.69      |

**Table S10.** Energetics of the minimum energy structures of **4**. Absolute electronic energy  $E$  and Gibbs free energy  $G$  (atomic units) are listed along with the reaction free energy  $\Delta G$  (kJ/mol) and the relative population at 298 K.

|     | M08HX/cc-pVDZ |            |                     |           | M08HX/cc-pVTZ |            |                     |           | $\omega$ B97M-D4/cc-pVTZ |            |                     |           |
|-----|---------------|------------|---------------------|-----------|---------------|------------|---------------------|-----------|--------------------------|------------|---------------------|-----------|
|     | $E$ (a.u.)    | $G$ (a.u.) | $\Delta G$ (kJ/mol) | Rel. pop. | $E$ (a.u.)    | $G$ (a.u.) | $\Delta G$ (kJ/mol) | Rel. pop. | $E$ (a.u.)               | $G$ (a.u.) | $\Delta G$ (kJ/mol) | Rel. pop. |
| Eca | -1363.315     | -1363.198  | 63.1                | 6.2E-12   | -1363.522     | -1363.405  | 63.2                | 5.9E-12   | -1364.129                | -1364.009  | 54.6                | 1.9E-10   |
| Ecs | -1363.317     | -1363.198  | 62.3                | 8.6E-12   | -1363.523     | -1363.404  | 63.7                | 4.7E-12   | -1364.129                | -1364.008  | 55.3                | 1.5E-10   |
| Eta | -1363.339     | -1363.220  | 4.8                 | 0.10      | -1363.545     | -1363.426  | 7.5                 | 0.03      | -1364.148                | -1364.027  | 5.8                 | 0.07      |
| Ets | -1363.332     | -1363.214  | 19.9                | 2.3E-04   | -1363.537     | -1363.419  | 24.3                | 3.9E-05   | -1364.141                | -1364.021  | 22.0                | 9.8E-05   |
| Zca | -1363.320     | -1363.203  | 48.8                | 1.9E-09   | -1363.527     | -1363.410  | 48.9                | 1.9E-09   | -1364.132                | -1364.012  | 46.9                | 4.2E-09   |
| Zcs | -1363.322     | -1363.204  | 46.2                | 5.6E-09   | -1363.529     | -1363.411  | 45.9                | 6.4E-09   | -1364.133                | -1364.013  | 43.0                | 2.1E-08   |
| Zta | -1363.338     | -1363.221  | 2.0                 | 0.31      | -1363.545     | -1363.427  | 2.9                 | 0.22      | -1364.148                | -1364.028  | 2.7                 | 0.24      |
| Zts | -1363.339     | -1363.222  | 0.0                 | 0.70      | -1363.546     | -1363.429  | 0.0                 | 0.70      | -1364.149                | -1364.029  | 0.0                 | 0.70      |

**Table S11.** Energetics of the minimum energy structures of **5**. Absolute electronic energy  $E$  and Gibbs free energy  $G$  (atomic units) are listed along with the reaction free energy  $\Delta G$  (kJ/mol) and the relative population at 298 K.

|      | M08HX/cc-pVDZ |            |                     |           | M08HX/cc-pVTZ |            |                     |           | $\omega$ B97M-D4/cc-pVTZ |            |                     |           |
|------|---------------|------------|---------------------|-----------|---------------|------------|---------------------|-----------|--------------------------|------------|---------------------|-----------|
|      | $E$ (a.u.)    | $G$ (a.u.) | $\Delta G$ (kJ/mol) | Rel. pop. | $E$ (a.u.)    | $G$ (a.u.) | $\Delta G$ (kJ/mol) | Rel. pop. | $E$ (a.u.)               | $G$ (a.u.) | $\Delta G$ (kJ/mol) | Rel. pop. |
| Ecca | -1527.896     | -1527.776  | 70.3                | 3.6E-13   | -1528.118     | -1527.997  | 72.0                | 1.8E-13   | -1528.612                | -1528.488  | 59.5                | 2.8E-11   |
| Eccs | -1527.896     | -1527.775  | 72.8                | 1.3E-13   | -1528.117     | -1527.996  | 75.8                | 3.9E-14   | -1528.611                | -1528.488  | 61.2                | 1.4E-11   |
| Ecta | -1527.897     | -1527.777  | 66.8                | 1.5E-12   | -1528.120     | -1527.999  | 67.2                | 1.2E-12   | -1528.611                | -1528.489  | 59.1                | 3.3E-11   |
| Ects | -1527.899     | -1527.778  | 63.6                | 5.2E-12   | -1528.121     | -1527.999  | 65.9                | 2.1E-12   | -1528.612                | -1528.489  | 57.7                | 5.8E-11   |
| Etca | -1527.911     | -1527.790  | 31.5                | 2.2E-06   | -1528.132     | -1528.011  | 34.8                | 5.8E-07   | -1528.622                | -1528.499  | 31.4                | 2.3E-06   |
| Etcs | -1527.904     | -1527.785  | 47.0                | 4.3E-09   | -1528.125     | -1528.005  | 51.2                | 8.0E-10   | -1528.615                | -1528.493  | 47.8                | 3.1E-09   |
| Etta | -1527.922     | -1527.800  | 5.5                 | 0.08      | -1528.143     | -1528.021  | 9.2                 | 0.02      | -1528.631                | -1528.508  | 7.4                 | 0.04      |
| Etts | -1527.917     | -1527.796  | 17.2                | 7.0E-04   | -1528.137     | -1528.016  | 22.3                | 9.0E-05   | -1528.626                | -1528.504  | 19.9                | 2.4E-04   |
| Zcca | -1527.902     | -1527.782  | 53.4                | 3.3E-10   | -1528.124     | -1528.003  | 55.8                | 1.2E-10   | -1528.614                | -1528.492  | 51.5                | 7.1E-10   |
| Zccs | -1527.903     | -1527.783  | 50.0                | 1.3E-09   | -1528.125     | -1528.005  | 52.1                | 5.4E-10   | -1528.616                | -1528.493  | 48.0                | 2.9E-09   |
| Zcta | -1527.903     | -1527.783  | 51.4                | 7.2E-10   | -1528.126     | -1528.005  | 52.2                | 5.3E-10   | -1528.615                | -1528.492  | 49.3                | 1.7E-09   |
| Zcts | -1527.905     | -1527.784  | 48.5                | 2.3E-09   | -1528.127     | -1528.006  | 48.7                | 2.2E-09   | -1528.616                | -1528.494  | 46.1                | 6.1E-09   |
| Ztca | -1527.910     | -1527.791  | 30.0                | 4.2E-06   | -1528.132     | -1528.012  | 32.1                | 1.8E-06   | -1528.623                | -1528.500  | 28.9                | 6.4E-06   |
| Ztcs | -1527.912     | -1527.793  | 25.7                | 2.3E-05   | -1528.134     | -1528.014  | 27.2                | 1.3E-05   | -1528.624                | -1528.502  | 24.4                | 3.9E-05   |
| Ztta | -1527.922     | -1527.802  | 1.8                 | 0.35      | -1528.144     | -1528.023  | 2.7                 | 0.25      | -1528.633                | -1528.510  | 2.2                 | 0.30      |
| Ztts | -1527.923     | -1527.802  | 0.0                 | 0.73      | -1528.145     | -1528.024  | 0.0                 | 0.73      | -1528.634                | -1528.511  | 0.0                 | 0.73      |

**Table S12.** Energetics of the minimum energy structures of **6**. Absolute electronic energy  $E$  and Gibbs free energy  $G$  (atomic units) are listed along with the reaction free energy  $\Delta G$  (kJ/mol) and the relative population at 298 K.

|      | M08HX/cc-pVDZ |            |                     |           | M08HX/cc-pVTZ |            |                     |           | $\omega$ B97M-D4/cc-pVTZ |            |                     |           |
|------|---------------|------------|---------------------|-----------|---------------|------------|---------------------|-----------|--------------------------|------------|---------------------|-----------|
|      | $E$ (a.u.)    | $G$ (a.u.) | $\Delta G$ (kJ/mol) | Rel. pop. | $E$ (a.u.)    | $G$ (a.u.) | $\Delta G$ (kJ/mol) | Rel. pop. | $E$ (a.u.)               | $G$ (a.u.) | $\Delta G$ (kJ/mol) | Rel. pop. |
| Ecca | -1484.399     | -1484.280  | 70.9                | 2.7E-13   | -1484.621     | -1484.502  | 72.1                | 1.7E-13   | -1485.091                | -1484.969  | 59.5                | 2.8E-11   |
| Eccs | -1484.399     | -1484.279  | 74.2                | 7.4E-14   | -1484.620     | -1484.500  | 75.9                | 3.7E-14   | -1485.090                | -1484.968  | 61.2                | 1.4E-11   |
| Ecta | -1484.401     | -1484.282  | 67.5                | 1.1E-12   | -1484.623     | -1484.503  | 67.3                | 1.2E-12   | -1485.091                | -1484.970  | 58.6                | 4.0E-11   |
| Ects | -1484.403     | -1484.284  | 62.8                | 7.2E-12   | -1484.624     | -1484.504  | 65.1                | 2.8E-12   | -1485.092                | -1484.970  | 57.0                | 7.5E-11   |
| Etca | -1484.414     | -1484.295  | 33.1                | 1.2E-06   | -1484.635     | -1484.515  | 35.7                | 4.0E-07   | -1485.101                | -1484.980  | 31.4                | 2.3E-06   |
| Etcs | -1484.407     | -1484.289  | 48.5                | 2.4E-09   | -1484.628     | -1484.509  | 52.1                | 5.5E-10   | -1485.095                | -1484.974  | 47.8                | 3.1E-09   |
| Etta | -1484.425     | -1484.305  | 6.1                 | 0.06      | -1484.646     | -1484.526  | 8.8                 | 0.02      | -1485.111                | -1484.989  | 7.5                 | 0.04      |
| Etts | -1484.420     | -1484.301  | 17.9                | 5.3E-04   | -1484.640     | -1484.521  | 21.8                | 1.1E-04   | -1485.105                | -1484.984  | 19.8                | 2.4E-04   |
| Zcca | -1484.405     | -1484.287  | 53.7                | 2.8E-10   | -1484.626     | -1484.508  | 55.7                | 1.3E-10   | -1485.093                | -1484.972  | 51.6                | 6.6E-10   |
| Zccs | -1484.406     | -1484.288  | 50.2                | 1.2E-09   | -1484.628     | -1484.509  | 52.1                | 5.4E-10   | -1485.095                | -1484.973  | 48.3                | 2.5E-09   |
| Zcta | -1484.407     | -1484.288  | 51.6                | 6.6E-10   | -1484.629     | -1484.509  | 51.8                | 6.2E-10   | -1485.094                | -1484.973  | 49.3                | 1.7E-09   |
| Zcts | -1484.408     | -1484.289  | 48.9                | 2.0E-09   | -1484.630     | -1484.511  | 48.4                | 2.4E-09   | -1485.096                | -1484.974  | 45.7                | 7.2E-09   |
| Ztca | -1484.413     | -1484.295  | 31.9                | 1.8E-06   | -1484.635     | -1484.517  | 32.8                | 1.3E-06   | -1485.102                | -1484.981  | 28.8                | 6.5E-06   |
| Ztcs | -1484.415     | -1484.297  | 28.0                | 9.0E-06   | -1484.637     | -1484.518  | 28.0                | 9.2E-06   | -1485.103                | -1484.982  | 24.5                | 3.7E-05   |
| Ztta | -1484.425     | -1484.307  | 1.8                 | 0.35      | -1484.647     | -1484.528  | 2.6                 | 0.25      | -1485.112                | -1484.991  | 2.2                 | 0.30      |
| Ztts | -1484.426     | -1484.307  | 0.0                 | 0.73      | -1484.648     | -1484.529  | 0.0                 | 0.73      | -1485.113                | -1484.992  | 0.0                 | 0.73      |

**Table S13.** Energetics of the minimum energy structures of **7**. Absolute electronic energy  $E$  and Gibbs free energy  $G$  (atomic units) are listed along with the reaction free energy  $\Delta G$  (kJ/mol) and the relative population at 298 K.

|      | M08HX/cc-pVDZ |            |                     |           | M08HX/cc-pVTZ |            |                     |           | $\omega$ B97M-D4/cc-pVTZ |            |                     |           |
|------|---------------|------------|---------------------|-----------|---------------|------------|---------------------|-----------|--------------------------|------------|---------------------|-----------|
|      | $E$ (a.u.)    | $G$ (a.u.) | $\Delta G$ (kJ/mol) | Rel. pop. | $E$ (a.u.)    | $G$ (a.u.) | $\Delta G$ (kJ/mol) | Rel. pop. | $E$ (a.u.)               | $G$ (a.u.) | $\Delta G$ (kJ/mol) | Rel. pop. |
| Ecca | -1363.314     | -1363.196  | 70.4                | 3.4E-13   | -1363.520     | -1363.402  | 72.2                | 1.6E-13   | -1364.128                | -1364.007  | 58.8                | 3.7E-11   |
| Eccs | -1363.314     | -1363.195  | 73.0                | 1.2E-13   | -1363.519     | -1363.401  | 75.7                | 4.0E-14   | -1364.127                | -1364.007  | 60.6                | 1.8E-11   |
| Ecta | -1363.315     | -1363.198  | 66.8                | 1.5E-12   | -1363.522     | -1363.404  | 67.4                | 1.2E-12   | -1364.128                | -1364.008  | 57.0                | 7.6E-11   |
| Ects | -1363.318     | -1363.199  | 62.4                | 8.5E-12   | -1363.524     | -1363.405  | 64.5                | 3.8E-12   | -1364.129                | -1364.009  | 55.0                | 1.7E-10   |
| Etca | -1363.329     | -1363.211  | 30.9                | 2.8E-06   | -1363.535     | -1363.417  | 34.6                | 6.5E-07   | -1364.139                | -1364.018  | 30.0                | 4.1E-06   |
| Etcs | -1363.322     | -1363.205  | 46.5                | 5.2E-09   | -1363.528     | -1363.410  | 51.1                | 8.2E-10   | -1364.132                | -1364.012  | 46.2                | 6.0E-09   |
| Etta | -1363.339     | -1363.220  | 6.6                 | 0.05      | -1363.545     | -1363.426  | 9.9                 | 0.01      | -1364.147                | -1364.027  | 7.7                 | 0.03      |
| Etts | -1363.334     | -1363.216  | 17.5                | 6.3E-04   | -1363.539     | -1363.421  | 22.4                | 8.8E-05   | -1364.142                | -1364.022  | 19.7                | 2.6E-04   |
| Zcca | -1363.320     | -1363.203  | 53.3                | 3.4E-10   | -1363.526     | -1363.408  | 56.0                | 1.1E-10   | -1364.130                | -1364.010  | 50.9                | 8.8E-10   |
| Zccs | -1363.321     | -1363.204  | 49.9                | 1.4E-09   | -1363.527     | -1363.410  | 52.8                | 4.2E-10   | -1364.132                | -1364.011  | 47.9                | 3.0E-09   |
| Zcta | -1363.321     | -1363.204  | 50.0                | 1.3E-09   | -1363.528     | -1363.410  | 51.4                | 7.5E-10   | -1364.132                | -1364.012  | 47.1                | 4.2E-09   |
| Zcts | -1363.323     | -1363.205  | 47.2                | 4.1E-09   | -1363.530     | -1363.411  | 48.1                | 2.8E-09   | -1364.133                | -1364.013  | 43.9                | 1.5E-08   |
| Ztca | -1363.328     | -1363.212  | 29.2                | 5.7E-06   | -1363.535     | -1363.418  | 32.0                | 1.8E-06   | -1364.139                | -1364.019  | 27.2                | 1.3E-05   |
| Ztcs | -1363.330     | -1363.213  | 26.3                | 1.9E-05   | -1363.537     | -1363.419  | 27.8                | 1.0E-05   | -1364.141                | -1364.021  | 22.9                | 7.2E-05   |
| Ztta | -1363.340     | -1363.222  | 1.7                 | 0.38      | -1363.546     | -1363.429  | 2.8                 | 0.24      | -1364.149                | -1364.029  | 2.1                 | 0.31      |
| Ztts | -1363.340     | -1363.223  | 0.0                 | 0.74      | -1363.547     | -1363.430  | 0.0                 | 0.74      | -1364.150                | -1364.030  | 0.0                 | 0.74      |

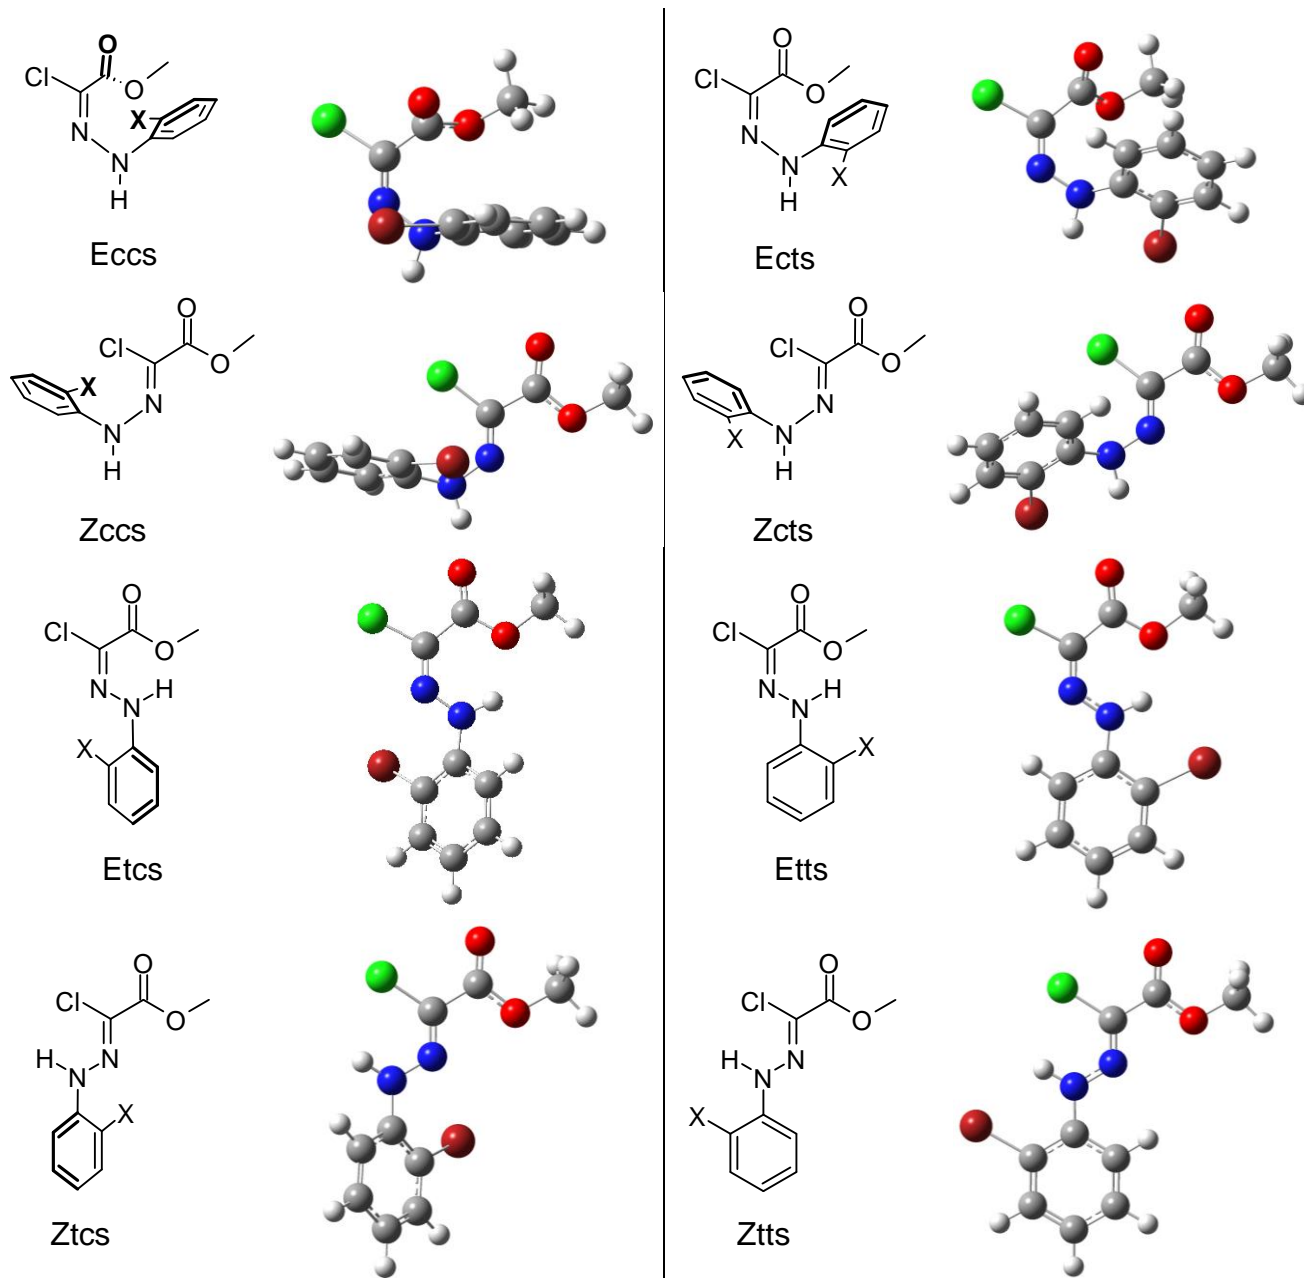

**Figure S6.** Selected ( $\gamma = s$ ) M08-HX/cc-pVTZ minimum energy structures of **6** (X = Br).



**Table S14.** Free energy activation barrier  $\Delta G^\ddagger$  and corresponding rate constant at 298 K for the isomer interconversion processes of **1**. The barriers are grouped with respect to the interconversion mechanism.

| Isomerization                   | From | To  | M08HX /cc-pVDZ                  |                                     | M08HX /cc-pVTZ                  |                                     | $\omega$ B97M-D4 /cc-pVTZ       |                                     |
|---------------------------------|------|-----|---------------------------------|-------------------------------------|---------------------------------|-------------------------------------|---------------------------------|-------------------------------------|
|                                 |      |     | $\Delta G^\ddagger$<br>(kJ/mol) | $k$ (s <sup>-1</sup> ) <sup>a</sup> | $\Delta G^\ddagger$<br>(kJ/mol) | $k$ (s <sup>-1</sup> ) <sup>a</sup> | $\Delta G^\ddagger$<br>(kJ/mol) | $k$ (s <sup>-1</sup> ) <sup>a</sup> |
| Rotation,<br>$\gamma$           | Eca  | Ecs | 14.9                            | 1.5E+10                             | 15.0                            | 1.4E+10                             | 7.4                             | 3.2E+11                             |
|                                 | Ecs  | Eca | 17.6                            | 5.1E+09                             | 15.0                            | 1.5E+10                             | 7.9                             | 2.6E+11                             |
|                                 | Eta  | Ets | 50.3                            | 9.5E+03                             | 43.1                            | 1.8E+05                             | 37.4                            | 1.7E+06                             |
|                                 | Ets  | Eta | 34.2                            | 6.4E+06                             | 25.9                            | 1.8E+08                             | 21.4                            | 1.1E+09                             |
|                                 | Zca  | Zcs | 20.0                            | 2.0E+09                             | 16.0                            | 9.6E+09                             | 9.6                             | 1.3E+11                             |
|                                 | Zcs  | Zca | 22.8                            | 6.2E+08                             | 19.4                            | 2.5E+09                             | 12.7                            | 3.7E+10                             |
|                                 | Zta  | Zts | 30.4                            | 3.0E+07                             | 26.1                            | 1.7E+08                             | 19.5                            | 2.4E+09                             |
|                                 | Zts  | Zta | 32.7                            | 1.1E+07                             | 29.0                            | 5.2E+07                             | 22.5                            | 7.1E+08                             |
| Rotation,<br>$\theta$           | Eca  | Eta | 14.2                            | 2.0E+10                             | 29.4                            | 4.4E+07                             | 27.3                            | 1.0E+08                             |
|                                 | Eta  | Eca | 74.3                            | 5.9E-01                             | 85.5                            | 6.6E-03                             | 75.8                            | 3.3E-01                             |
|                                 | Ecs  | Ets | 32.2                            | 1.4E+07                             | 32.0                            | 1.5E+07                             | 27.8                            | 8.4E+07                             |
|                                 | Ets  | Ecs | 73.4                            | 8.6E-01                             | 71.0                            | 2.2E+00                             | 59.7                            | 2.2E+02                             |
|                                 | Zca  | Zta | 24.4                            | 3.4E+08                             | 23.6                            | 4.5E+08                             | 20.8                            | 1.4E+09                             |
|                                 | Zta  | Zca | 71.1                            | 2.1E+00                             | 69.4                            | 4.2E+00                             | 63.7                            | 4.3E+01                             |
|                                 | Zcs  | Zts | 24.3                            | 3.5E+08                             | 23.5                            | 4.8E+08                             | 18.8                            | 3.2E+09                             |
|                                 | Zts  | Zcs | 70.5                            | 2.7E+00                             | 68.9                            | 5.2E+00                             | 61.6                            | 1.0E+02                             |
| Umklapp, $\Phi$<br>( $\theta$ ) | Eca  | Zta | 51.7                            | 5.4E+03                             | 50.8                            | 7.7E+03                             | 59.8                            | 2.1E+02                             |
|                                 | Zta  | Eca | 113.8                           | 7.1E-08                             | 110.9                           | 2.3E-07                             | 111.7                           | 1.6E-07                             |
|                                 | Ecs  | Zts | 63.8                            | 4.1E+01                             | 63.0                            | 5.7E+01                             | 68.1                            | 7.2E+00                             |
|                                 | Zts  | Ecs | 125.5                           | 6.5E-10                             | 126.1                           | 5.1E-10                             | 122.5                           | 2.2E-09                             |
|                                 | Eta  | Zca | 110.2                           | 3.1E-07                             | 105.7                           | 1.9E-06                             | 104.5                           | 3.1E-06                             |
|                                 | Zca  | Eta | 65.4                            | 2.2E+01                             | 63.8                            | 4.1E+01                             | 65.0                            | 2.5E+01                             |
|                                 | Ets  | Zcs | 94.9                            | 1.5E-04                             | 89.9                            | 1.1E-03                             | 89.9                            | 1.1E-03                             |
|                                 | Zcs  | Ets | 69.2                            | 4.7E+00                             | 68.5                            | 6.2E+00                             | 69.6                            | 4.0E+00                             |

<sup>a</sup> The rate constants were calculated using Eyring formula  $k = \kappa (k_B T/h) \exp(-\Delta G^\ddagger/RT)$  with  $\kappa = 1$  and  $T = 298$  K.

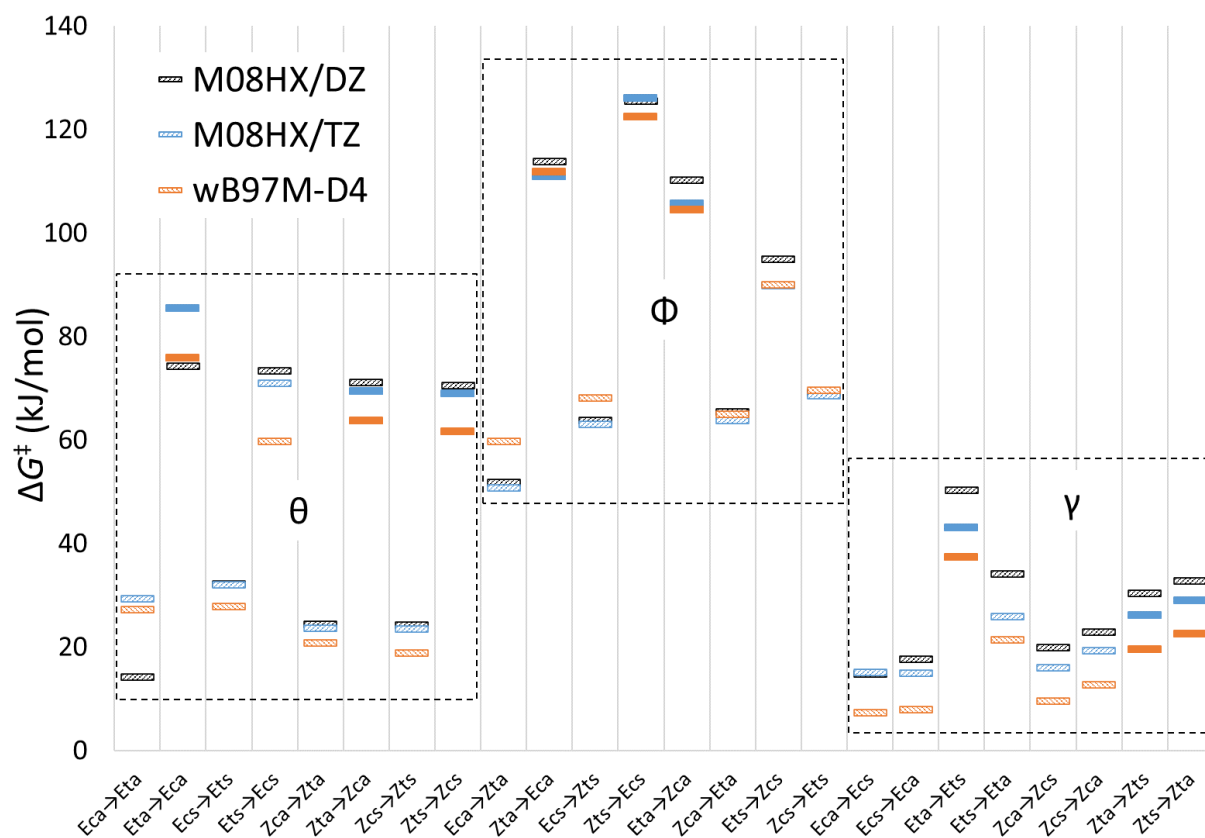

**Figure S7.** Activation barriers  $\Delta G^\ddagger$  at 298 K of the isomerization processes of **1** calculated at the M08HX/DZ, M08HX/TZ, and  $\omega$ B97M-D4/TZ level of theory. The barriers are grouped as to the isomerization type. The vertical lines are just a guide to the eye.

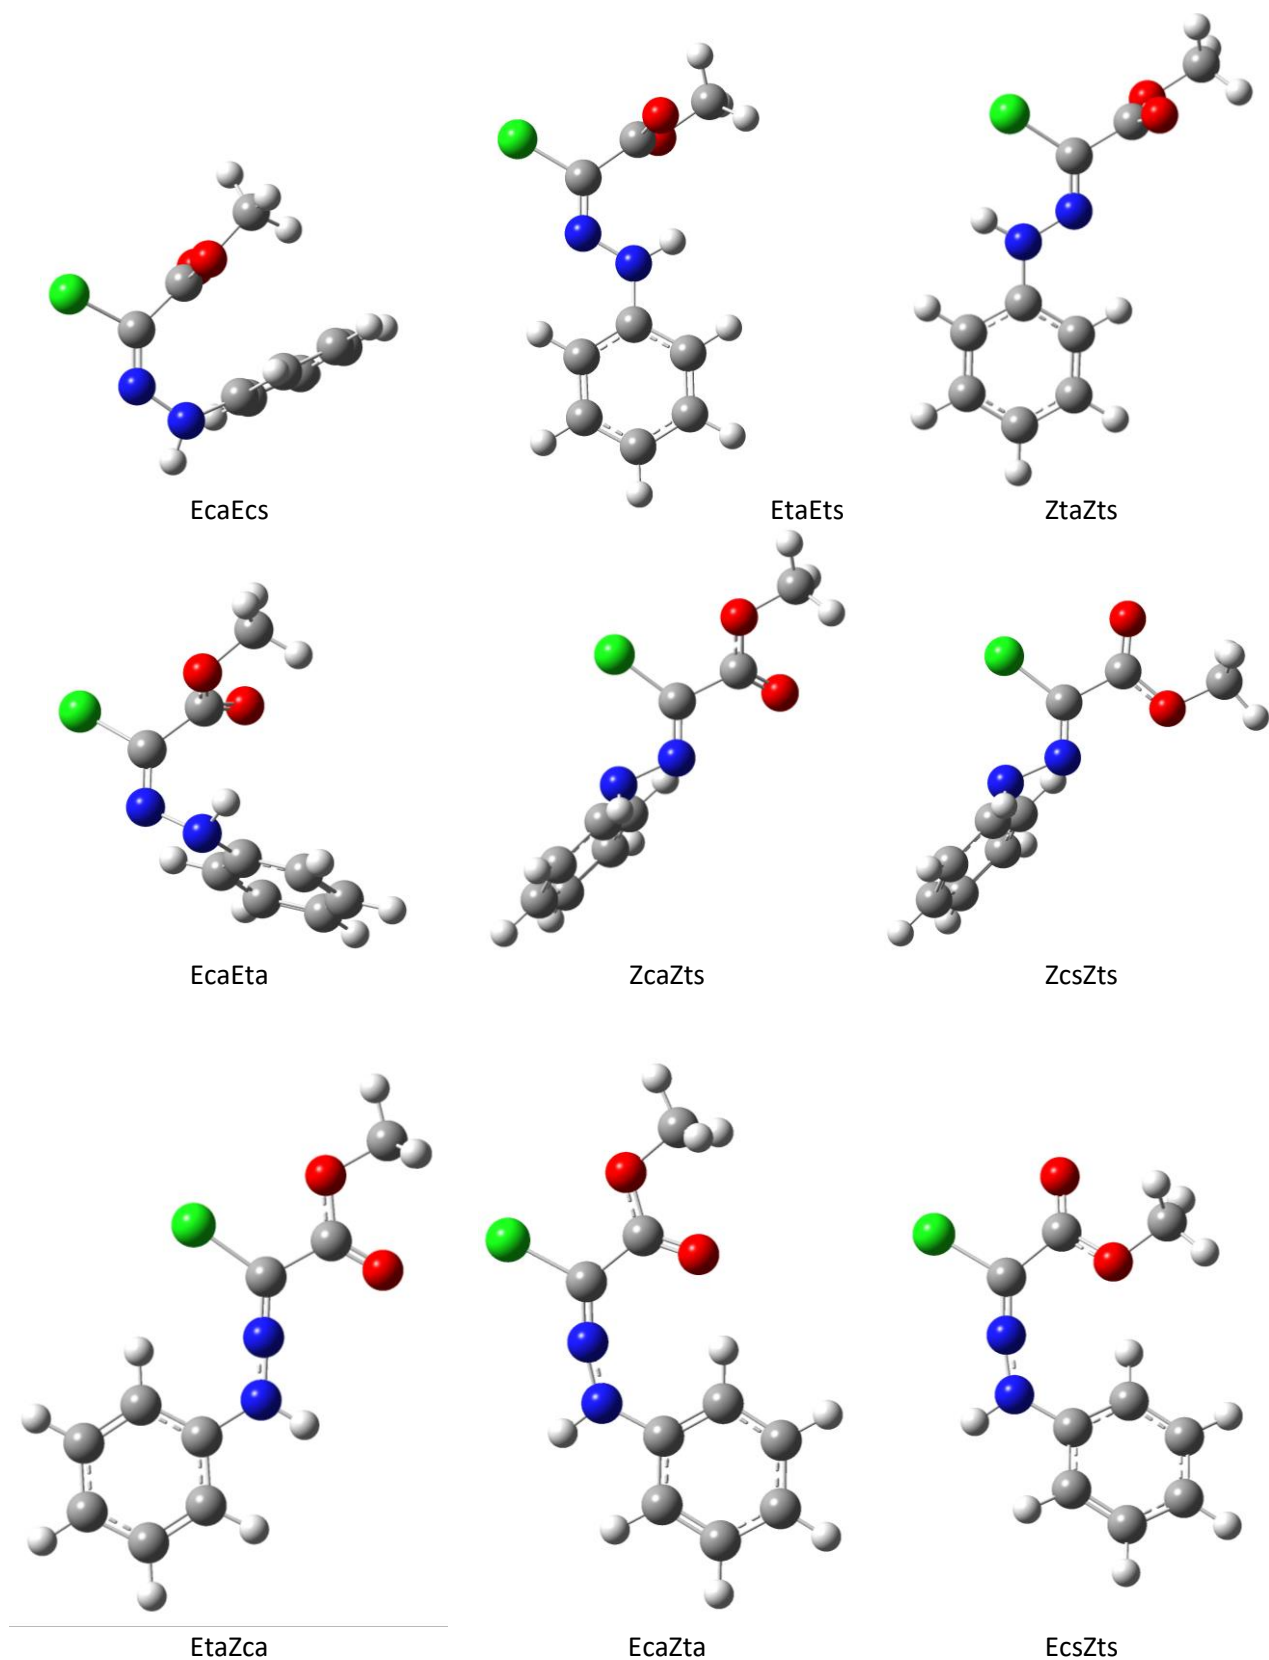

**Figure S8.** Selected transition state structures of **1** calculated at the M08HX/cc-pVTZ level.

**Table S15.** Selected molecular geometric parameters of the TS structures of **1**. Bond lengths in angstrom, planar and dihedral angles in degree. When  $\Phi \approx 180^\circ$ ,  $\theta$  is of limited structural meaning, as the C=N–N moiety is nearly linear.

| Isomerization                   | TS     | M08HX /cc-pVDZ |       |        |          |        |                | M08HX /cc-pVTZ |       |        |          |        |                | $\omega$ B97M-D4 /cc-pVTZ |       |        |          |        |                |
|---------------------------------|--------|----------------|-------|--------|----------|--------|----------------|----------------|-------|--------|----------|--------|----------------|---------------------------|-------|--------|----------|--------|----------------|
|                                 |        | C=N            | N-N   | $\Phi$ | $\theta$ | $\psi$ | $\delta\Sigma$ | C=N            | N-N   | $\Phi$ | $\theta$ | $\psi$ | $\delta\Sigma$ | C=N                       | N-N   | $\Phi$ | $\theta$ | $\psi$ | $\delta\Sigma$ |
| Rotation,<br>$\gamma$           | EcaEcs | 1.265          | 1.354 | 236.2  | 12.7     | -95.4  | 11.3           | 1.256          | 1.353 | 235.4  | 15.8     | -92.8  | 12.0           | 1.259                     | 1.346 | 235.5  | 0.0      | -113.4 | 2.6            |
|                                 | EtaEts | 1.269          | 1.330 | 240.2  | -177.8   | 4.4    | 0.4            | 1.260          | 1.332 | 239.7  | -176.4   | 5.8    | 1.0            | 1.259                     | 1.347 | 240.3  | 170.4    | 16.3   | 5.5            |
|                                 | ZcaZcs | 1.263          | 1.372 | 119.8  | 63.0     | -6.5   | 22.7           | 1.255          | 1.369 | 120.8  | 61.3     | -7.3   | 20.4           | 1.254                     | 1.382 | 120.1  | -64.7    | -7.9   | 23.4           |
|                                 | ZtaZts | 1.267          | 1.322 | 121.4  | 179.8    | 0.1    | 0.0            | 1.258          | 1.322 | 121.5  | 179.5    | 0.2    | 0.0            | 1.257                     | 1.332 | 121.2  | 175.3    | 9.5    | 1.1            |
| Rotation,<br>$\theta$           | EcaEta | 1.268          | 1.401 | 241.0  | 91.8     | -16.2  | 27.3           | 1.255          | 1.412 | 244.4  | 91.8     | -15.8  | 22.6           | 1.257                     | 1.436 | 243.6  | -54.1    | -34.6  | 18.4           |
|                                 | EcsEts | 1.265          | 1.430 | 243.6  | 54.4     | -29.8  | 20.4           | 1.257          | 1.432 | 243.9  | 60.1     | -29.2  | 21.1           | 1.258                     | 1.436 | 243.6  | -54.8    | -33.0  | 18.5           |
|                                 | ZcaZta | 1.263          | 1.419 | 115.0  | -117.8   | -22.1  | 32.5           | 1.254          | 1.418 | 115.6  | -117.3   | -23.4  | 31.0           | 1.252                     | 1.428 | 115.6  | 121.0    | -31.4  | 31.4           |
|                                 | ZcsZts | 1.264          | 1.420 | 115.0  | -117.9   | -24.2  | 32.2           | 1.256          | 1.419 | 115.6  | -118.3   | -26.9  | 30.6           | 1.256                     | 1.427 | 115.3  | 118.8    | -25.5  | 31.1           |
| Umklapp, $\Phi$<br>( $\theta$ ) | EcaZta | 1.236          | 1.274 | 192.5  | -0.3     | 0.0    | 0.0            | 1.228          | 1.272 | 191.7  | -1.2     | -1.3   | 0.0            | 1.225                     | 1.281 | 191.0  | 0.9      | -1.9   | 0.1            |
|                                 | EcsZts | 1.233          | 1.275 | 189.6  | -14.8    | -16.4  | 0.3            | 1.224          | 1.273 | 188.4  | -16.9    | -19.2  | 0.3            | 1.222                     | 1.282 | 187.5  | -17.5    | -19.1  | 0.4            |
|                                 | EtaZca | 1.228          | 1.269 | 179.5  | 178.0    | -179.8 | 0.0            | 1.220          | 1.267 | 180.0  | -35.4    | 0.2    | 0.0            | 1.220                     | 1.276 | 179.8  | -30.7    | 1.1    | 0.0            |
|                                 | EtsZcs | 1.228          | 1.270 | 178.7  | 179.1    | -179.7 | 0.0            | 1.221          | 1.268 | 178.9  | -178.7   | 0.3    | 0.0            | 1.220                     | 1.276 | 179.1  | 163.2    | 1.1    | 0.0            |

$\delta\Sigma$  is the difference  $\delta\Sigma = 360^\circ - \Sigma$ , where  $\Sigma$  is the sum of the planar angles about the –NH– atom.

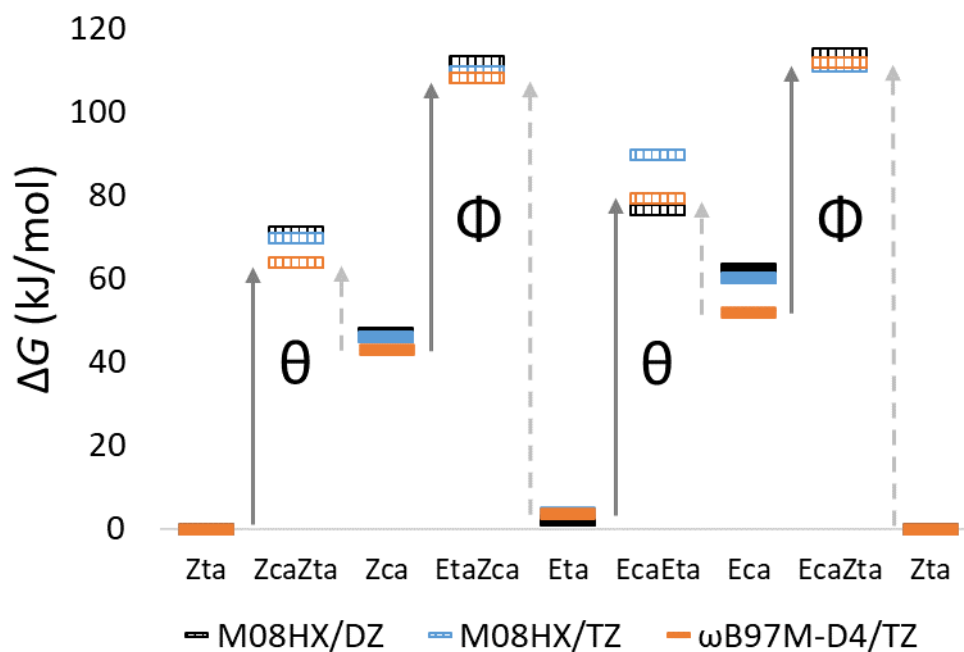

**Figure S9.** Energetics of the shortest paths for the interconversion between **1-Zta** and **1-Eta** involving an umklapp and a  $\theta$  isomerization step. Solid bars indicate minimum energy isomers and hatched bars indicate transition states. The fast (slow) pathways are indicated by full (dashed) arrows.

HOMO (highest occ.  $\pi$  MO)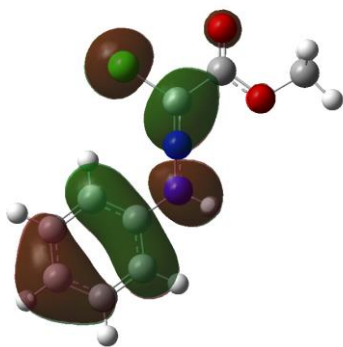

HOMO-2

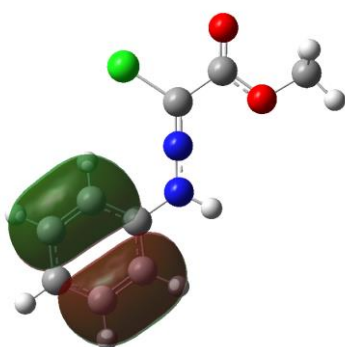

HOMO-3

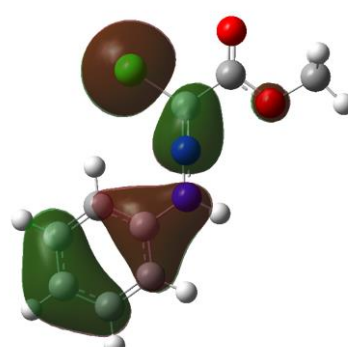

HOMO-6

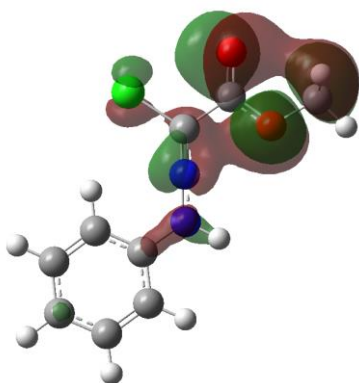

HOMO-7

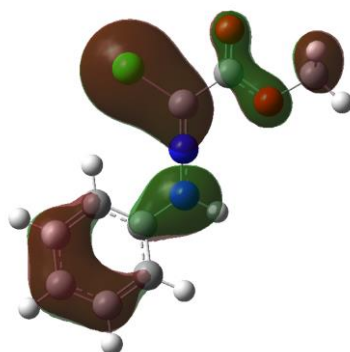

HOMO-11

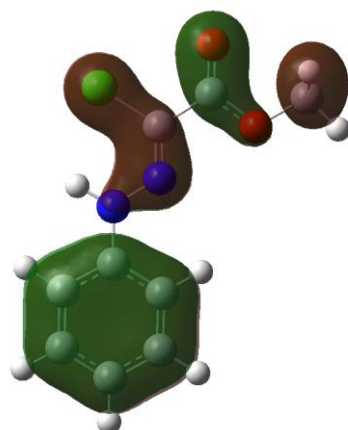

HOMO-12

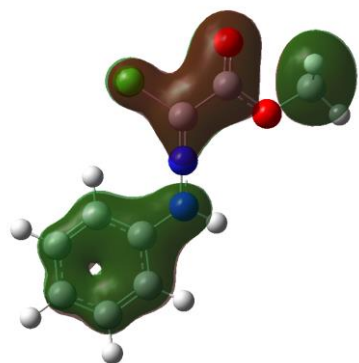

HOMO-18

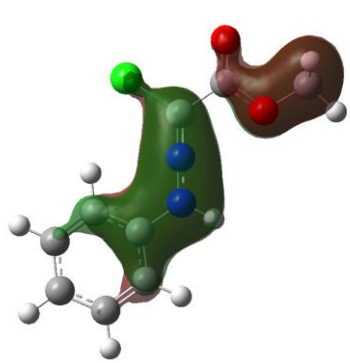HOMO-20 (lowest occ.  $\pi$  MO)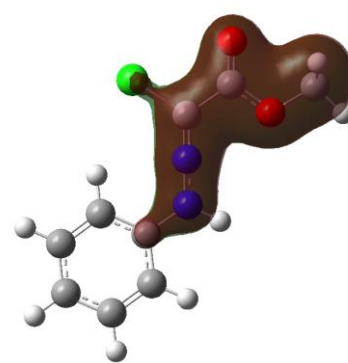

**Figure S10.**  $\omega$ B97M-D4/cc-pVTZ  $\pi$  MOs of **1-EtsZcs**. Comparison with Figure S3 shows that TS MOs can be viewed as a merely “straightened” version of the MOs of the minimum energy isomer.

55 HOMO highest occ.  $\pi$

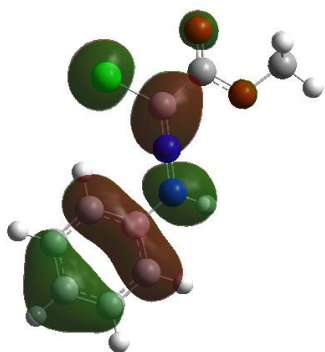

53 HOMO - 2

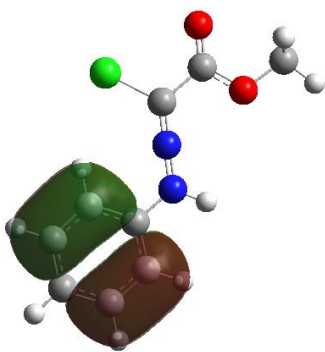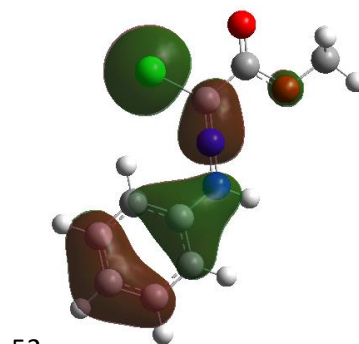

52

50

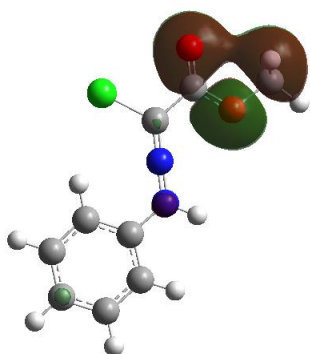

48 HOMO - 7

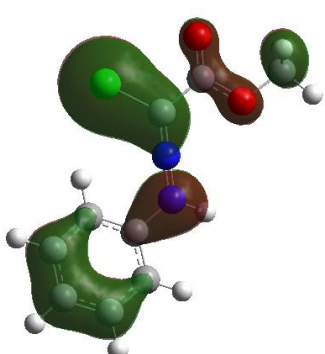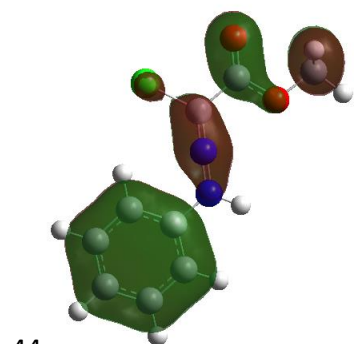

44

43

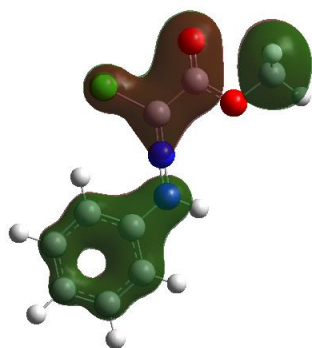

37

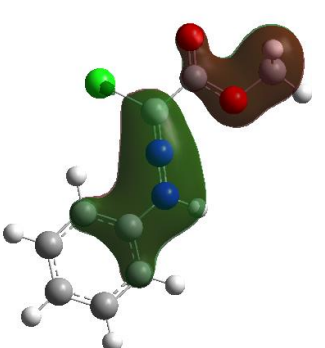

34 HOMO - 21 lowest occ.  $\pi$

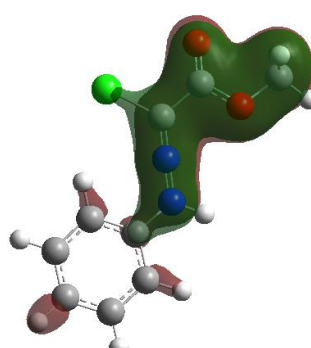

**Figure S11.** M08HX/cc-pVDZ  $\pi$  MOs of **1-EtsZcs**.

55 HOMO highest occ.  $\pi$

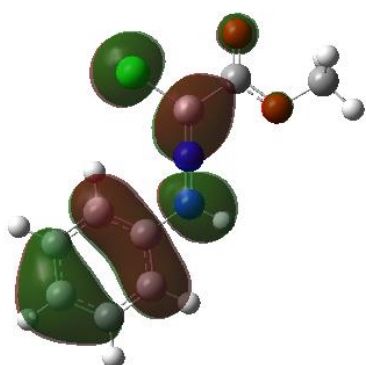

53 HOMO - 2

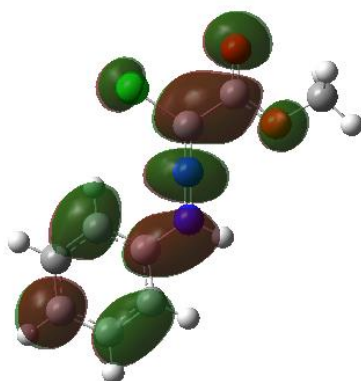

52

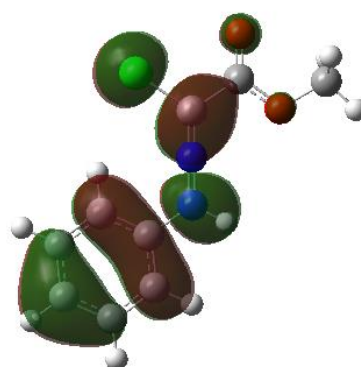

50

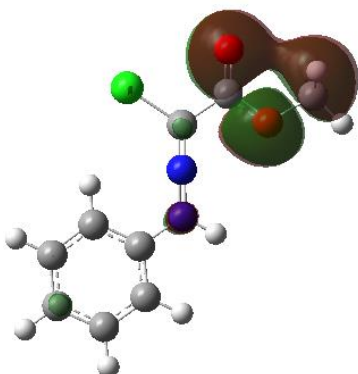

48 HOMO - 7

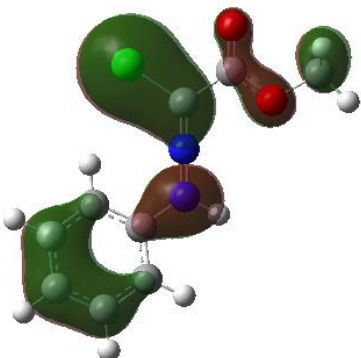

44

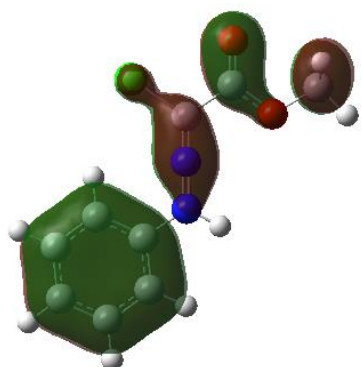

43

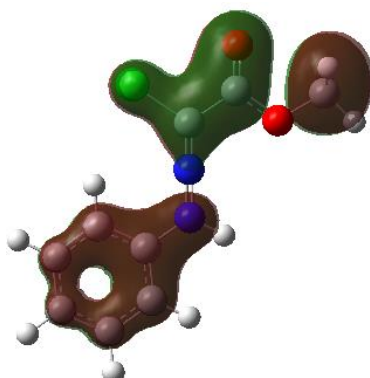

37

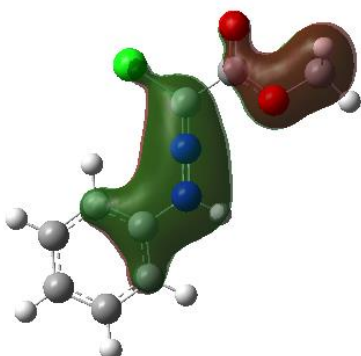

34 HOMO - 21 lowest occ.  $\pi$

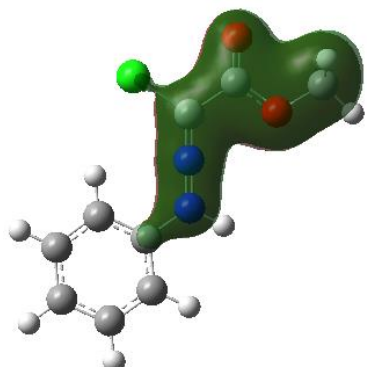

**Figure S12.** M08HX/cc-pVTZ  $\pi$  MOs of **1-EtsZcs**.



**Table S16.** Free energy activation barrier  $\Delta G^\ddagger$  for selected isomer interconversion processes of **2**. The barriers are grouped with respect to the interconversion mechanism.

| Isomerization                           | From | To  | $\Delta G^\ddagger$<br>(kJ/mol) |          |                  |
|-----------------------------------------|------|-----|---------------------------------|----------|------------------|
|                                         |      |     | M08HX                           | M08HX    | $\omega$ B97M-D4 |
|                                         |      |     | /cc-pVDZ                        | /cc-pVDZ | /cc-pVTZ         |
| Rotation,<br>$\gamma$                   | Zta  | Zts | 28.6                            | 25.0     | 19.4             |
|                                         | Zts  | Zta | 31.4                            | 28.4     | 22.0             |
| Rotation,<br>$\theta$                   | Eca  | Eta | 28.2                            | 26.4     | 22.7             |
|                                         | Eta  | Eca | 87.1                            | 83.0     | 70.9             |
|                                         | Zca  | Zta | 23.6                            | 24.1     | 16.2             |
|                                         | Zta  | Zca | 69.1                            | 68.9     | 59.7             |
|                                         | Eca  | Zta | 53.8                            | 52.2     | 60.8             |
| <i>Umklapp</i> , $\Phi$<br>( $\theta$ ) | Zta  | Eca | 113.3                           | 112.0    | 112.0            |
|                                         | Eta  | Zca | 111.5                           | 106.6    | 105.9            |
|                                         | Zca  | Eta | 66.6                            | 65.0     | 65.4             |

**Table S17.** Free energy activation barrier  $\Delta G^\ddagger$  for selected isomer interconversion processes of **3**. The barriers are grouped with respect to the interconversion mechanism.

| Isomerization                           | From | To  | $\Delta G^\ddagger$<br>(kJ/mol) |          |                  |
|-----------------------------------------|------|-----|---------------------------------|----------|------------------|
|                                         |      |     | M08HX                           | M08HX    | $\omega$ B97M-D4 |
|                                         |      |     | /cc-pVDZ                        | /cc-pVDZ | /cc-pVTZ         |
| Rotation,<br>$\gamma$                   | Zta  | Zts | 29.7                            | 25.6     | 18.9             |
|                                         | Zts  | Zta | 31.7                            | 28.5     | 21.5             |
| Rotation,<br>$\theta$                   | Eca  | Eta | 27.3                            | 25.6     | 22.0             |
|                                         | Eta  | Eca | 86.1                            | 81.8     | 70.7             |
|                                         | Zca  | Zta | 23.7                            | 23.9     | 16.1             |
|                                         | Zta  | Zca | 70.1                            | 69.5     | 59.9             |
|                                         | Eca  | Zta | 52.2                            | 58.7     | 60.6             |
| <i>Umklapp</i> , $\Phi$<br>( $\theta$ ) | Zta  | Eca | 113.7                           | 119.5    | 112.4            |
|                                         | Eta  | Zca | 110.7                           | 106.5    | 106.0            |
|                                         | Zca  | Eta | 67.1                            | 65.4     | 65.3             |

**Table S18.** Free energy activation barrier  $\Delta G^\ddagger$  for selected isomer interconversion processes of **4**. The barriers are grouped with respect to the interconversion mechanism.

| Isomerization                            | From | To  | $\Delta G^\ddagger$<br>(kJ/mol) |                   |                              |
|------------------------------------------|------|-----|---------------------------------|-------------------|------------------------------|
|                                          |      |     | M08HX<br>/cc-pVDZ               | M08HX<br>/cc-pVDZ | $\omega$ B97M-D4<br>/cc-pVTZ |
|                                          |      |     |                                 |                   |                              |
| Rotation,<br>$\gamma$                    | Zta  | Zts | 29.9                            | 25.9              | 18.8                         |
|                                          | Zts  | Zta | 31.9                            | 28.8              | 21.4                         |
| Rotation,<br>$\theta$                    | Eca  | Eta | 27.1                            | 26.2              | 21.5                         |
|                                          | Eta  | Eca | 85.4                            | 81.9              | 70.2                         |
|                                          | Zca  | Zta | 23.1                            | 23.0              | 18.6                         |
|                                          | Zta  | Zca | 69.9                            | 69.0              | 62.9                         |
| <i>Umklaapp</i> , $\Phi$<br>( $\theta$ ) | Eca  | Zta | 53.0                            | 51.5              | 61.0                         |
|                                          | Zta  | Eca | 114.0                           | 111.8             | 112.9                        |
|                                          | Eta  | Zca | 110.4                           | 105.8             | 106.1                        |
|                                          | Zca  | Eta | 66.3                            | 64.5              | 65.0                         |

**Table S19.** Free energy activation barrier  $\Delta G^\ddagger$  for selected isomer interconversion processes of **5**. The barriers are grouped with respect to the interconversion mechanism.

| Isomerization                            | From | To   | $\Delta G^\ddagger$<br>(kJ/mol) |                   |                              |
|------------------------------------------|------|------|---------------------------------|-------------------|------------------------------|
|                                          |      |      | M08HX<br>/cc-pVDZ               | M08HX<br>/cc-pVDZ | $\omega$ B97M-D4<br>/cc-pVTZ |
|                                          |      |      |                                 |                   |                              |
| Rotation,<br>$\gamma$                    | Ztta | Ztts | 28.8                            | 25.5              | 18.9                         |
|                                          | Ztts | Ztta | 30.7                            | 28.2              | 21.2                         |
| Rotation,<br>$\theta$                    | Ecta | Etta | 25.7                            | 24.3              | 17.3                         |
|                                          | Etta | Ecta | 87.0                            | 82.3              | 68.9                         |
|                                          | Zcta | Ztta | 20.4                            | 18.1              | 10.4                         |
|                                          | Ztta | Zcta | 69.9                            | 67.6              | 57.4                         |
| Rotation, $\psi$                         | Etca | Etta | 13.5                            | 12.7              | 6.1                          |
|                                          | Etta | Etca | 39.5                            | 38.3              | 30.1                         |
|                                          | Ztca | Ztta | 12.1                            | 10.6              | 5.0                          |
|                                          | Ztta | Ztca | 40.2                            | 40.0              | 31.7                         |
|                                          | Ztcs | Ztts | 13.2                            | 11.7              | -16.3                        |
|                                          | Ztts | Ztcs | 38.9                            | 38.8              | 29.9                         |
| <i>Umklaapp</i> , $\Phi$<br>( $\theta$ ) | Ecta | Ztta | 50.0                            | 51.1              | 57.8                         |
|                                          | Ztta | Ecta | 115.0                           | 115.6             | 114.6                        |
|                                          | Etta | Zcta | 110.3                           | 105.7             | 104.9                        |
|                                          | Zcta | Etta | 64.4                            | 62.7              | 63.0                         |

**Table S20.** Free energy activation barrier  $\Delta G^\ddagger$  for selected isomer interconversion processes of **6**. The barriers are grouped with respect to the interconversion mechanism.

| Isomerization                           | From | To   | $\Delta G^\ddagger$<br>(kJ/mol) |                   |                              |
|-----------------------------------------|------|------|---------------------------------|-------------------|------------------------------|
|                                         |      |      | M08HX<br>/cc-pVDZ               | M08HX<br>/cc-pVDZ | $\omega$ B97M-D4<br>/cc-pVTZ |
|                                         |      |      |                                 |                   |                              |
| Rotation,<br>$\gamma$                   | Ztta | Ztts | 29.7                            | 25.4              | 18.8                         |
|                                         | Ztts | Ztta | 31.5                            | 28.1              | 21.0                         |
| Rotation,<br>$\theta$                   | Ecta | Etta | 25.0                            | 23.9              | 17.6                         |
|                                         | Etta | Ecta | 86.4                            | 82.5              | 68.7                         |
|                                         | Zcta | Ztta | 20.6                            | 18.2              | 10.4                         |
|                                         | Ztta | Zcta | 70.4                            | 67.3              | 57.6                         |
| Rotation, $\psi$                        | Etca | Etta | 12.1                            | 11.5              | 5.9                          |
|                                         | Etta | Etca | 39.0                            | 38.4              | 29.8                         |
|                                         | Ztca | Ztta | 10.9                            | 10.2              | 5.2                          |
|                                         | Ztta | Ztca | 41.0                            | 40.3              | 31.8                         |
|                                         | Ztcs | Ztts | 12.0                            | 11.1              | -15.7                        |
|                                         | Ztts | Ztcs | 40.0                            | 39.0              | 29.9                         |
| <i>Umklapp</i> , $\Phi$<br>( $\theta$ ) | Ecta | Ztta | 49.4                            | 52.0              | 58.7                         |
|                                         | Ztta | Ecta | 115.2                           | 116.7             | 115.1                        |
|                                         | Etta | Zcta | 110.1                           | 105.7             | 104.6                        |
|                                         | Zcta | Etta | 64.6                            | 62.7              | 62.8                         |

**Table S21.** Free energy activation barrier  $\Delta G^\ddagger$  for selected isomer interconversion processes of **7**. The barriers are grouped with respect to the interconversion mechanism.

| Isomerization                           | From | To   | $\Delta G^\ddagger$<br>(kJ/mol) |                   |                              |
|-----------------------------------------|------|------|---------------------------------|-------------------|------------------------------|
|                                         |      |      | M08HX<br>/cc-pVDZ               | M08HX<br>/cc-pVDZ | $\omega$ B97M-D4<br>/cc-pVTZ |
|                                         |      |      |                                 |                   |                              |
| Rotation,<br>$\gamma$                   | Ztta | Ztts | 29.3                            | 25.8              | 18.5                         |
|                                         | Ztts | Ztta | 31.0                            | 28.5              | 20.6                         |
| Rotation,<br>$\theta$                   | Ecta | Etta | 25.5                            | 23.7              | 19.0                         |
|                                         | Etta | Ecta | 85.6                            | 81.2              | 68.3                         |
|                                         | Zcta | Ztta | 22.4                            | 19.2              | 16.9                         |
|                                         | Ztta | Zcta | 70.7                            | 67.8              | 61.8                         |
| Rotation, $\psi$                        | Etca | Etta | 12.7                            | 12.1              | 5.8                          |
|                                         | Etta | Etca | 37.0                            | 36.8              | 28.1                         |
|                                         | Ztca | Ztta | 12.0                            | 10.1              | 5.5                          |
|                                         | Ztta | Ztca | 39.5                            | 39.4              | 30.6                         |
|                                         | Ztcs | Ztts | 12.4                            | 10.9              | -14.8                        |
|                                         | Ztts | Ztcs | 38.7                            | 38.7              | 29.2                         |
| <i>Umklapp</i> , $\Phi$<br>( $\theta$ ) | Ecta | Ztta | 50.1                            | 53.0              | 59.8                         |
|                                         | Ztta | Ecta | 115.2                           | 117.6             | 114.7                        |
|                                         | Etta | Zcta | 109.5                           | 105.1             | 104.2                        |
|                                         | Zcta | Etta | 66.2                            | 63.7              | 64.8                         |
